# Supplementary material for: Community science participants gain environmental awareness and contribute high quality data but improvements are needed: insights from Bumble Bee Watch
Source: PeerJ. 2020 May 12;8:e9141. doi: 10.7717/peerj.9141 (PMC7227640; doi:10.7717/peerj.9141)
Supplement: Data S3 [file peerj-08-9141-s003.xlsx]

## Sheet: abbrev BBW bees, nest 20180228
newID number	Nest Id	Bee Id	Provinces/States	Country	Date Observed	observer code just number	Status	Source
1	1		Wisconsin	United States	2013-08-15	37	Pending	Website
2	4		Wisconsin	United States	2013-11-30	1094	Pending	Website
3	5		Wisconsin	United States	2013-12-16	7213	Pending	Website
4	6		Wisconsin	United States	2013-12-16	7213	Verified	Website
5	7		Wisconsin	United States	2013-08-28	37	Verified	Website
6	8		New York	United States	2013-08-24	3669	Pending	Website
7	9		New York	United States	2013-08-24	3669	Verified	Website
8	10		Wisconsin	United States	2013-08-23	7814	Verified	Website
9	11		Minnesota	United States	2013-07-30	7300	Verified	Website
10	12		Washington	United States	2011-06-26	1930	Verified	Website
11	13		Texas	United States	2012-09-08	1161	Verified	Website
12	14		New York	United States	2008-06-19	3436	Verified	Website
13	15		California	United States	2013-05-04	2993	Verified	Website
14	16		California	United States	2014-02-23	2993	Verified	Website
15	17		Oregon	United States	2014-03-17	4059	Verified	Website
16	18		California	United States	2014-03-26	5787	Verified	Website
17	19		Washington	United States	2014-04-13	1930	Verified	Website
18	20		New York	United States	2010-05-02	3436	Verified	Website
19	21		North Carolina	United States	2014-04-23	6994	Verified	Website
20	22		British Columbia	Canada	2014-04-26	3240	Verified	Website
21	23		British Columbia	Canada	2014-05-02	3402	Verified	Website
22	24		Oregon	United States	2014-05-03	4470	Verified	Website
23	25		New York	United States	2014-05-04	3669	Verified	Website
24	26		Oregon	United States	2014-04-30	6952	Verified	Website
25	27		California	United States	2012-08-13	1732	Verified	Website
26	29		British Columbia	Canada	2014-05-13	3402	Verified	Website
27	30		Washington	United States	2014-05-13	6033	Pending	Website
28	31		Washington	United States	2014-05-18	7385	Pending	Website
29	32		Washington	United States	2014-05-11	1986	Pending	Website
30	33		Washington	United States	2014-05-29	1930	Pending	Website
31	34		Oregon	United States	2014-04-02	6877	Pending	Website
32	35		Washington	United States	2014-05-29	1930	Pending	Website
33	36		Alberta	Canada	2014-05-31	8414	Pending	Website
34	37		British Columbia	Canada	2014-06-07	3240	Pending	Website
35	38		Minnesota	United States	2014-06-08	791	Pending	Website
36	39		Washington	United States	2014-06-09	1930	Pending	Website
37	40		California	United States	2014-06-15	3153	Pending	Website
38	41		Delaware	United States	2014-06-15	4286	Pending	Website
39	42		British Columbia	Canada	2014-06-19	2774	Pending	Website
40	43		Michigan	United States	2014-06-16	8242	Pending	Website
41	44		Minnesota	United States	2014-06-27	3647	Pending	Website
42	45		New York	United States	2014-07-03	7137	Pending	Website
43	46		Washington	United States	2014-07-03	5779	Pending	Website
44	47		Indiana	United States	2014-07-05	8321	Pending	Website
45	48		North Carolina	United States	2014-07-07	3754	Pending	Website
46	49		Washington	United States	2014-07-13	4433	Pending	Website
47	50		Montana	United States	2014-07-15	3214	Pending	Website
48	51		Wyoming	United States	2014-07-16	7574	Pending	Website
49	52		Alberta	Canada	2014-07-12	7630	Verified	Website
50	53		Alberta	Canada	2014-07-17	2136	Pending	Website
51	54		Alberta	Canada	2014-07-23	444	Pending	Website
52	55		Alberta	Canada	2014-07-22	8163	Pending	Website
53	56		Wyoming	United States	2014-07-25	2557	Pending	Website
54	57		Ontario	Canada	2014-07-24	1824	Verified	Website
55	58		Washington	United States	2014-07-28	7790	Pending	Website
56	59		Illinois	United States	2014-07-11	685	Verified	Website
57	60		Minnesota	United States	2014-07-20	3622	Verified	Website
58	61		Illinois	United States	2014-08-13	685	Pending	Website
59	62		Manitoba	Canada	2014-08-18	7334	Pending	Website
60	63		Minnesota	United States	2014-07-26	969	Pending	Website
61	64		North Dakota	United States	2014-08-01	4110	Pending	Website
62	65		Texas	United States	2014-08-30	3823	Pending	Website
63	66		Massachusetts	United States	2014-09-06	5197	Pending	Website
64	67		British Columbia	Canada	2014-05-21	4357	Pending	Website
65	68		New York	United States	2014-09-25	6416	Pending	Website
66	70		Massachusetts	United States	2014-10-08	7011	Pending	Website
67	71		California	United States	2015-02-18	6807	Pending	Website
68	72		Maine	United States	2015-03-06	6864	Pending	Website
69	73		Oregon	United States	2015-03-20	4351	Pending	Website
70	74		British Columbia	Canada	2015-02-22	3240	Pending	Website
71	75		Oregon	United States	2015-04-20	1659	Pending	Website
72	76		Oregon	United States	2015-04-18	6952	Pending	Website
73	77		Oregon	United States	2015-04-25	2700	Pending	Website
74	78		Oregon	United States	2015-04-27	5358	Pending	Website
75	80		Quebec	Canada	2015-05-01	7671	Pending	Website
76	81		Washington	United States	2015-05-09	1103	Pending	Website
77	82		Washington	United States	2015-05-01	4210	Pending	Website
78	83		Washington	United States	2015-05-09	7186	Pending	Website
79	84		Washington	United States	2015-05-15	4443	Pending	Website
80	85		Washington	United States	2015-05-15	4443	Pending	Website
81	90		Indiana	United States	2015-05-21	6117	Pending	Website
82	92		Indiana	United States	2015-04-23	6117	Pending	Website
83	93		Missouri	United States	2015-05-22	3796	Pending	Website
84	94		British Columbia	Canada	2015-06-03	3122	Pending	Website
85	96		Michigan	United States	2015-06-08	254	Pending	Website
86	97		Oregon	United States	2015-06-10	5737	Pending	Website
87	98		Florida	United States	2015-06-08	1183	Pending	Website
88	99		Florida	United States	2015-06-15	2405	Pending	Website
89	100		Washington	United States	2015-06-22	4443	Pending	Website
90	101		South Carolina	United States	2015-06-16	1946	Verified	Website
91	102		Alberta	Canada	2015-06-12	7413	Pending	Website
92	103		Washington	United States	2015-06-28	5056	Pending	Website
93	104		Washington	United States	2015-05-03	4210	Pending	Website
94	105		Indiana	United States	2015-06-30	6117	Pending	Website
95	106		Iowa	United States	2015-07-07	6814	Pending	Website
96	107		Illinois	United States	2015-07-10	6436	Pending	Website
97	108		Oregon	United States	2015-07-10	898	Pending	Website
98	109		Ontario	Canada	2015-07-08	5277	Verified	Website
99	110		Ontario	Canada	2015-07-13	5277	Pending	Website
100	111		Ontario	Canada	2015-07-04	990	Pending	Website
101	112		Ontario	Canada	2015-07-15	2098	Verified	Website
102	113		Ontario	Canada	2015-07-15	4556	Verified	Website
103	114		Pennsylvania	United States	2015-06-05	515	Pending	Website
104	115		Nebraska	United States	2015-07-19	8242	Pending	Website
105	116		Ontario	Canada	2015-07-20	2070	Pending	Website
106	117		Colorado	United States	2015-07-20	3132	Pending	Website
107	118		Manitoba	Canada	2015-07-22	921	Pending	Website
108	119		Ontario	Canada	2015-07-13	2501	Pending	Website
109	121		Illinois	United States	2015-07-26	7061	Pending	Website
110	122		Manitoba	Canada	2015-07-26	4319	Pending	Website
111	123		New York	United States	2015-07-29	4195	Pending	Website
112	124		Ohio	United States	2015-07-29	3371	Verified	Website
113	125		Colorado	United States	2015-07-31	985	Pending	Website
114	126		Alberta	Canada	2015-08-01	754	Pending	Website
115	127		Wisconsin	United States	2015-07-25	5851	Pending	Website
116	128		Wisconsin	United States	2013-05-30	5851	Pending	Website
117	129		New Mexico	United States	2015-08-06	5229	Pending	Website
118	130		New Mexico	United States	2015-08-06	5229	Pending	Website
119	131		Illinois	United States	2015-08-05	6595	Pending	Website
120	133		Newfoundland and Labrador	Canada	2015-08-09	4686	Pending	Website
121	134		Ontario	Canada	2015-08-10	468	Pending	Website
122	136		Nebraska	United States	2015-08-23	8242	Pending	Website
123	137		Illinois	United States	2015-07-28	685	Pending	Website
124	138		Illinois	United States	2014-08-20	685	Pending	Website
125	139		Illinois	United States	2014-08-20	685	Pending	Website
126	140		Illinois	United States	2014-06-27	685	Pending	Website
127	141		Illinois	United States	2013-07-25	685	Pending	Website
128	142		South Dakota	United States	2015-09-01	3344	Pending	Website
129	143		Ontario	Canada	2015-07-01	3373	Verified	Website
130	144		Texas	United States	2015-09-16	5903	Pending	Website
131	145		Ohio	United States	2015-09-04	521	Verified	Website
132	146		Pennsylvania	United States	2015-09-25	7830	Pending	Website
133	147		Illinois	United States	2014-09-01	685	Pending	Website
134	148		Ohio	United States	2015-10-02	1569	Pending	Website
135	149		Washington	United States	2010-06-19	2969	Pending	Website
136	150		Massachusetts	United States	2015-10-04	5906	Pending	Website
137	151		British Columbia	Canada	2016-03-29	3240	Pending	Website
138	152		Washington	United States	2016-04-13	1224	Pending	Website
139	153		British Columbia	Canada	2016-04-18	2819	Pending	Website
140	154		Oregon	United States	2016-04-22	3388	Pending	Website
141	155		California	United States	2016-05-07	6628	Pending	Website
142	156		Ontario	Canada	2016-05-21	1734	Pending	Website
143	157		Washington	United States	2016-05-22	7580	Pending	Website
144	158		South Carolina	United States	2016-05-28	2135	Pending	Website
145	159		California	United States	2016-04-15	6810	Pending	Website
146	160		Minnesota	United States	2016-06-11	3095	Pending	Website
147	161		California	United States	2016-06-01	2553	Pending	Website
148	162		Oklahoma	United States	2016-06-13	3196	Pending	Website
149	163		Nova Scotia	Canada	2016-06-16	7398	Pending	Website
150	165		Colorado	United States	2015-06-21	6599	Pending	Website
151	166		Oregon	United States	2016-06-21	2969	Pending	Website
152	167		Washington	United States	2016-06-28	4665	Pending	Website
153	168		Washington	United States	2016-07-02	3148	Pending	Website
154	169		Minnesota	United States	2016-07-06	4107	Pending	Website
155	170		Minnesota	United States	2016-07-07	4107	Pending	Website
156	171		Illinois	United States	2016-07-08	4184	Pending	Website
157	172		Minnesota	United States	2016-07-08	7880	Pending	Website
158	173		Ontario	Canada	2016-07-09	770	Pending	Website
159	174		Ontario	Canada	2016-07-10	7343	Pending	Website
160	175		Minnesota	United States	2016-07-01	7917	Pending	Website
161	176		Colorado	United States	2016-07-14	8099	Pending	Website
162	177		Minnesota	United States	2016-07-17	4107	Pending	Website
163	178		Quebec	Canada	2016-07-20	5569	Pending	Website
164	179		Virginia	United States	2016-07-23	8396	Pending	Website
165	180		Ontario	Canada	2016-07-24	676	Pending	Website
166	181		Quebec	Canada	2016-07-21	4648	Pending	Website
167	182		Ontario	Canada	2016-07-27	3677	Pending	Website
168	183		Manitoba	Canada	2016-07-26	3753	Pending	Website
169	184		British Columbia	Canada	2016-04-09	7977	Pending	Website
170	185		Ontario	Canada	2016-07-28	3869	Pending	Website
171	186		Ontario	Canada	2016-07-30	3447	Pending	Website
172	187		Ontario	Canada	2016-07-30	3447	Pending	Website
173	188		Saskatchewan	Canada	2016-07-30	8006	Pending	Website
174	189		Saskatchewan	Canada	2016-07-30	3265	Pending	Website
175	190		Virginia	United States	2016-07-22	8396	Pending	Website
176	191		California	United States	2016-08-02	3962	Pending	Website
177	192		Ontario	Canada	2016-06-13	316	Pending	Website
178	193		Texas	United States	2016-08-02	1835	Pending	Website
179	194		Ontario	Canada	2016-08-01	5472	Pending	Website
180	195		Ontario	Canada	2016-07-30	5472	Pending	Website
181	196		Ontario	Canada	2015-07-30	448	Pending	Website
182	197		Alberta	Canada	2016-08-03	613	Pending	Website
183	198		Ontario	Canada	2016-08-05	425	Pending	Website
184	199		Alberta	Canada	2016-08-06	8071	Pending	Website
185	200		Alberta	Canada	2016-08-05	4605	Pending	Website
186	201		Ontario	Canada	2016-08-08	7358	Pending	Website
187	202		Ontario	Canada	2016-07-31	4153	Pending	Website
188	203		Manitoba	Canada	2016-08-08	2199	Pending	Website
189	204		Pennsylvania	United States	2016-08-06	1834	Pending	Website
190	224		Saskatchewan	Canada	2016-08-06	6410	Pending	Website
191	225		Saskatchewan	Canada	2016-07-20	6410	Pending	Website
192	226		New Brunswick	Canada	2016-08-06	5428	Pending	Website
193	227		Ontario	Canada	2016-08-09	1865	Pending	Website
194	228		Ontario	Canada	2016-08-10	8406	Pending	Website
195	229		Minnesota	United States	2016-08-04	4107	Pending	Website
196	230		Alberta	Canada	2016-08-11	6295	Pending	Website
197	231		Alberta	Canada	2016-08-11	6295	Pending	Website
198	232		Nova Scotia	Canada	2016-08-11	3067	Pending	Website
199	233		Minnesota	United States	2016-08-11	1041	Pending	Website
200	234		Alberta	Canada	2016-06-28	3134	Pending	Website
201	235		Saskatchewan	Canada	2016-08-13	8475	Verified	Website
202	236		Saskatchewan	Canada	2016-08-13	8475	Verified	Website
203	237		Saskatchewan	Canada	2016-08-01	8475	Verified	Website
204	238		Saskatchewan	Canada	2016-08-08	8475	Verified	Website
205	239		Ontario	Canada	2016-08-18	6732	Verified	Website
206	240		Alberta	Canada	2016-04-12	7294	Invalid	Website
207	241		Texas	United States	2016-08-18	6825	Verified	Website
208	242		Ontario	Canada	2016-08-17	6911	Verified	Website
209	243		Ontario	Canada	2016-08-20	7478	Invalid	Website
210	244		Alberta	Canada	2016-08-13	4722	Invalid	Website
211	245		Ontario	Canada	1969-12-31	6613	Invalid	Website
212	246		Texas	United States	2016-08-23	1161	Verified	Website
213	247		Colorado	United States	2016-09-08	3972	Verified	Website
214	248		Saskatchewan	Canada	2016-08-05	4958	Verified	Website
215	249		Wisconsin	United States	2016-09-25	2164	Verified	Website
216	250		Quebec	Canada	2016-10-10	6609	Invalid	Website
217	251		Saskatchewan	Canada	2014-08-13	2898	Verified	Website
218	252		Wisconsin	United States	2016-11-03	910	Verified	Website
219	253		Wisconsin	United States	2016-07-15	6204	Verified	Website
220	254		Wisconsin	United States	2016-07-17	6204	Verified	Website
221	255		Minnesota	United States	2016-08-11	1476	Pending	Website
222	256		Wisconsin	United States	2016-05-30	5851	Pending	Website
223	257		Alberta	Canada	2016-06-19	5851	Pending	Website
224	258		Minnesota	United States	2016-07-01	1886	Pending	Website
225	259		Minnesota	United States	2016-08-14	414	Pending	Website
226	261		California	United States	2017-04-04	3199	Pending	Website
227	262		Wisconsin	United States	2016-07-06	335	Pending	Website
228	263		California	United States	2017-04-23	230	Pending	Website
229	264		Nunavut	Canada	2017-04-24	7076	Pending	Website
230	265		Connecticut	United States	2017-04-28	6575	Pending	Website
231	266		California	United States	2017-05-01	2993	Pending	Website
232	267		Ohio	United States	2017-05-07	7748	Pending	Website
233	268		Ontario	Canada	2015-06-20	8341	Verified	Website
234	270		Oregon	United States	2017-05-19	1556	Pending	Website
235	271		Oregon	United States	2017-05-22	925	Pending	Website
236	272		Oregon	United States	2017-05-20	354	Pending	Website
237	273		British Columbia	Canada	2017-05-27	649	Pending	Website
238	274		Oregon	United States	2017-05-27	6479	Pending	Website
239	275		Michigan	United States	2017-06-01	6917	Pending	Website
240	277		British Columbia	Canada	2017-05-26	5941	Pending	Website
241	278		Idaho	United States	2017-06-06	226	Pending	Website
242	280		Minnesota	United States	2017-06-08	4991	Pending	Website
243	283		Illinois	United States	2017-06-16	702	Pending	Website
244	284		Ontario	Canada	2017-06-21	3727	Pending	Website
245	285		Virginia	United States	2017-06-24	7719	Pending	Website
246	287		Saskatchewan	Canada	2017-06-17	8475	Pending	Website
247	289		Massachusetts	United States	2017-06-25	6540	Pending	Website
248	290		Pennsylvania	United States	2017-06-25	5706	Pending	Website
249	292		Wisconsin	United States	2017-06-07	6449	Pending	Website
250	293		Minnesota	United States	2017-07-02	8122	Pending	Website
251	294		Minnesota	United States	2017-07-03	8318	Pending	Website
252	295		Illinois	United States	2017-07-04	2646	Pending	Website
253	296		Alberta	Canada	2017-07-04	6444	Pending	Website
254	297		Alberta	Canada	2017-07-04	6444	Pending	Website
255	299		Ohio	United States	2017-07-09	2044	Pending	Website
256	300		Wisconsin	United States	2017-07-12	3850	Pending	Website
257	301		Massachusetts	United States	2017-06-06	5773	Pending	Website
258	302		New Jersey	United States	2017-07-15	7072	Pending	Website
259	303		Alberta	Canada	2017-07-15	1990	Pending	Website
260	304		Ohio	United States	2017-07-16	1286	Pending	Website
261	305		British Columbia	Canada	2017-07-07	6573	Pending	Website
262	306		Minnesota	United States	2017-07-17	7524	Pending	Website
263	307		Manitoba	Canada	2017-07-19	4951	Pending	Website
264	308		Nova Scotia	Canada	2017-07-16	4863	Pending	Website
265	309		Oregon	United States	2017-07-21	6877	Pending	Website
266	310		Alberta	Canada	2017-07-24	1207	Pending	Website
267	311		Alberta	Canada	2017-07-25	1207	Pending	Website
268	312		Alberta	Canada	2017-07-24	1207	Pending	Website
269	313		Alberta	Canada	2017-07-25	1207	Pending	Website
270	314		Alberta	Canada	2017-07-25	1207	Pending	Website
271	315		Ontario	Canada	2017-07-26	5298	Pending	Website
272	316		Minnesota	United States	2017-07-23	1748	Pending	Website
273	317		Wisconsin	United States	2017-07-16	7337	Pending	Website
274	318		Ontario	Canada	2017-07-29	448	Pending	Website
275	319		Florida	United States	2017-07-30	5593	Pending	Website
276	320		New Jersey	United States	2017-08-01	5977	Pending	Website
277	321		Ontario	Canada	2017-06-24	3677	Pending	Website
278	322		New York	United States	2016-07-29	4352	Pending	Website
279	323		Iowa	United States	2017-08-02	257	Pending	Website
280	324		Iowa	United States	2017-08-02	257	Pending	Website
281	325		Idaho	United States	2017-08-05	7760	Pending	Website
282	326		Massachusetts	United States	2017-08-10	4598	Pending	Website
283	327		Wisconsin	United States	2017-08-10	3391	Pending	Website
284	328		Wisconsin	United States	2017-08-10	3391	Pending	Website
285	329		Idaho	United States	2017-08-11	7760	Pending	Website
286	330		Idaho	United States	2017-08-11	7760	Pending	Website
287	331		Michigan	United States	2015-07-15	526	Pending	Website
288	332		Colorado	United States	2017-07-30	2387	Pending	Website
289	333		Alberta	Canada	2017-08-08	8335	Pending	Website
290	334		Texas	United States	2017-08-13	1476	Pending	Website
291	335		Alberta	Canada	2017-08-11	1207	Pending	Website
292	336		Alberta	Canada	2017-08-04	1207	Pending	Website
293	337		Idaho	United States	2017-08-19	7760	Pending	Website
294	338		Idaho	United States	2017-08-19	7760	Pending	Website
295	339		Texas	United States	2017-07-21	6831	Pending	Website
296	340		Ontario	Canada	2017-08-27	972	Pending	Website
297	341		British Columbia	Canada	2017-08-07	7872	Pending	Website
298	342		Minnesota	United States	2017-08-28	1079	Pending	Website
299	344		Ontario	Canada	2017-08-29	4952	Pending	Website
300	345		Wisconsin	United States	2017-08-31	3886	Pending	Website
301	346		Wisconsin	United States	2017-09-04	4018	Pending	Website
302	347		Ontario	Canada	2017-08-02	7587	Pending	Website
303	351		Minnesota	United States	2017-09-22	5351	Pending	Website
304	354		California	United States	2017-03-31	2890	Pending	Website
305	357		Ontario	Canada	2017-08-16	6960	Pending	Website
306	358		Prince Edward Island	Canada	2017-10-15	8376	Pending	Website
307	360		Maine	United States	2015-07-19	1911	Pending	Website
308	361		Nova Scotia	Canada	2017-10-29	4863	Pending	Website
309	362		Arizona	United States	2017-10-31	1102	Pending	Website
310	364		Alberta	Canada	2017-08-03	4467	Verified	Website
311	365		Alberta	Canada	2017-08-03	4467	Pending	Website
312	366		Alberta	Canada	2017-08-03	4467	Pending	Website
313	367		Wisconsin	United States	2017-08-06	7814	Pending	Website
314	368		Florida	United States	2017-12-26	7043	Pending	Website
315	369		California	United States	2018-02-06	1231	Pending	Website
316		5	Washington	United States	2013-08-21	6877	Verified	Website
317		6	Georgia	United States	2013-08-25	37	Verified	Website
318		8	Washington	United States	2013-08-21	6877	Verified	Website
319		9	Oregon	United States	2012-06-18	6877	Verified	Website
320		10	Oregon	United States	2012-06-18	6877	Verified	Website
321		12	Oregon	United States	2012-06-18	6877	Verified	Website
322		13	Wisconsin	United States	2013-08-20	1568	Verified	Website
323		14	Wisconsin	United States	2013-08-15	1568	Verified	Website
324		15	Ontario	Canada	2013-06-27	8341	Verified	Website
325		16	Ontario	Canada	2013-07-19	8341	Verified	Website
326		18	Montana	United States	2013-08-28	3687	Verified	Website
327		20	Idaho	United States	2013-07-13	6877	Verified	Website
328		21	Saskatchewan	Canada	2013-07-17	6877	Verified	Website
329		22	Washington	United States	2013-05-19	5876	Verified	Website
330		24	Vermont	United States	2013-09-06	5034	Verified	Website
331		25	Washington	United States	2013-03-28	5876	Verified	Website
332		26	Wyoming	United States	2012-08-20	963	Verified	Website
333		27	Wyoming	United States	2012-07-18	963	Verified	Website
334		31	Quebec	Canada	2005-07-11	37	Verified	Website
335		32	Oregon	United States	2012-06-29	6877	Verified	Website
336		33	Ontario	Canada	2013-07-16	2473	Verified	Website
337		34	Ontario	Canada	2013-07-28	2473	Invalid	Website
338		35	Ontario	Canada	2013-07-19	2473	Verified	Website
339		36	Washington	United States	2013-09-01	5876	Verified	Website
340		37	Vermont	United States	2013-09-03	5034	Verified	Website
341		38	Minnesota	United States	2013-08-08	5034	Verified	Website
342		40	Oregon	United States	2013-08-06	2873	Verified	Website
343		41	Wisconsin	United States	2011-08-11	2873	Verified	Website
344		42	Wisconsin	United States	2010-08-11	2873	Verified	Website
345		43	Wisconsin	United States	2011-08-17	2873	Verified	Website
346		44	Quebec	Canada	2013-07-30	5841	Invalid	Website
347		45	Wisconsin	United States	2011-08-24	2873	Verified	Website
348		50	Alberta	Canada	2012-04-11	1094	Verified	Website
349		56	Saskatchewan	Canada	2013-07-13	6877	Verified	Website
350		57	Illinois	United States	2013-07-25	6877	Verified	Website
351		58	Oregon	United States	2013-08-14	6877	Verified	Website
352		59	Oregon	United States	2012-08-30	6877	Verified	Website
353		61	Oregon	United States	2013-06-16	6877	Verified	Website
354		62	Washington	United States	2011-08-18	6877	Verified	Website
355		63	California	United States	2009-06-16	6877	Verified	Website
356		64	California	United States	2003-06-07	6877	Verified	Website
357		65	Oregon	United States	2012-05-10	6877	Verified	Website
358		66	Oregon	United States	2013-08-07	6877	Verified	Website
359		67	Oregon	United States	2013-08-07	6877	Verified	Website
360		68	Minnesota	United States	2012-06-20	1094	Verified	Website
361		69	Wisconsin	United States	2013-08-28	6877	Invalid	Website
362		70	Wisconsin	United States	2013-08-28	6877	Verified	Website
363		74	California	United States	2013-07-30	2873	Verified	Website
364		75	Oregon	United States	2014-01-08	1092	Invalid	Website
365		76	British Columbia	Canada	2013-07-29	8014	Verified	Website
366		79	Oregon	United States	2014-01-08	1092	Invalid	Website
367		80	Oregon	United States	2014-01-01	1092	Invalid	Website
368		81	Oregon	United States	2014-01-01	1092	Invalid	Website
369		82	Idaho	United States	2014-01-01	1092	Invalid	Website
370		86	Ontario	Canada	2013-04-27	8341	Verified	Website
371		87	Ontario	Canada	2013-07-10	2473	Verified	Website
372		88	Minnesota	United States	2012-08-21	3098	Verified	Website
373		89	Minnesota	United States	2012-07-17	3098	Verified	Website
374		90	Minnesota	United States	2012-07-07	3098	Verified	Website
375		91	Minnesota	United States	2012-07-14	3098	Verified	Website
376		92	Minnesota	United States	2012-07-17	3098	Verified	Website
377		93	Ontario	Canada	2013-08-16	2591	Verified	Website
378		94	Minnesota	United States	2013-06-27	3098	Verified	Website
379		95	Quebec	Canada	2013-04-28	8477	Invalid	Website
380		96	Florida	United States	2013-11-18	6760	Verified	Website
381		97	Florida	United States	2013-11-18	6760	Verified	Website
382		98	Oregon	United States	2013-09-18	2648	Invalid	Website
383		99	Oregon	United States	2013-09-18	2648	Verified	Website
384		100	Quebec	Canada	2012-06-14	8477	Verified	Website
385		101	Colorado	United States	2013-07-24	7330	Verified	Website
386		102	Wisconsin	United States	2013-09-12	7011	Verified	Website
387		103	Minnesota	United States	2011-07-24	3098	Verified	Website
388		104	Alberta	Canada	2012-06-16	2856	Verified	Website
389		105	Minnesota	United States	2013-08-10	3098	Verified	Website
390		106	Minnesota	United States	2013-09-09	2046	Verified	Website
391		107	Washington	United States	2013-07-07	8436	Verified	Website
392		108	Washington	United States	2013-07-09	8436	Verified	Website
393		109	Alabama	United States	2013-04-05	3593	Verified	Website
394		110	Minnesota	United States	2013-09-09	2046	Verified	Website
395		111	Montana	United States	2011-08-31	3214	Verified	Website
396		112	Minnesota	United States	2013-09-09	2046	Verified	Website
397		114	Montana	United States	2011-08-31	3214	Verified	Website
398		115	Ontario	Canada	2010-08-27	959	Verified	Website
399		116	Minnesota	United States	2011-07-31	2046	Verified	Website
400		117	Utah	United States	2012-08-03	1696	Verified	Website
401		118	Washington	United States	2013-06-29	1877	Invalid	Website
402		119	Oregon	United States	2013-08-28	6877	Verified	Website
403		120	Montana	United States	2010-08-30	2046	Verified	Website
404		121	Minnesota	United States	2010-07-17	2046	Verified	Website
405		122	Wyoming	United States	2011-06-28	1564	Verified	Website
406		124	British Columbia	Canada	2008-06-22	2232	Verified	Website
407		126	Connecticut	United States	2012-09-04	1564	Verified	Website
408		127	British Columbia	Canada	2008-08-13	2232	Verified	Website
409		128	British Columbia	Canada	2013-04-23	150	Verified	Website
410		129	Wyoming	United States	2013-07-20	1564	Verified	Website
411		130	Minnesota	United States	2010-06-07	2046	Verified	Website
412		131	Wyoming	United States	2013-06-18	931	Verified	Website
413		132	Wyoming	United States	2013-07-20	1564	Verified	Website
414		133	New Jersey	United States	2013-08-11	5469	Invalid	Website
415		134	California	United States	2013-11-16	4015	Invalid	Website
416		135	Wyoming	United States	2013-09-05	1564	Verified	Website
417		136	Minnesota	United States	2010-05-26	2046	Verified	Website
418		137	Utah	United States	2009-04-30	3425	Verified	Website
419		138	Pennsylvania	United States	2012-07-13	6019	Verified	Website
420		139	Utah	United States	2009-04-30	3425	Verified	Website
421		140	Saskatchewan	Canada	2013-08-15	1712	Verified	Website
422		141	British Columbia	Canada	2008-07-28	2232	Verified	Website
423		143	Virginia	United States	2013-10-12	4531	Verified	Website
424		144	British Columbia	Canada	2010-06-16	2232	Verified	Website
425		145	Indiana	United States	2013-08-25	3140	Verified	Website
426		146	New Jersey	United States	2013-07-07	5469	Verified	Website
427		147	Oregon	United States	2012-05-05	4884	Invalid	Website
428		148	Pennsylvania	United States	2012-07-13	6019	Verified	Website
429		149	California	United States	2014-01-22	6976	Invalid	Website
430		151	Massachusetts	United States	2010-07-21	877	Invalid	Website
431		152	Pennsylvania	United States	2013-08-11	5736	Verified	Website
432		153	Pennsylvania	United States	2012-09-12	6019	Verified	Website
433		154	North Carolina	United States	2011-07-22	1824	Verified	Website
434		155	California	United States	2006-07-28	3431	Verified	Website
435		156	New York	United States	2011-10-26	7753	Verified	Website
436		157	Pennsylvania	United States	2012-06-23	6019	Verified	Website
437		158	North Carolina	United States	2011-06-15	1824	Verified	Website
438		159	California	United States	2013-07-23	4656	Verified	Website
439		160	Wisconsin	United States	2013-09-14	5496	Verified	Website
440		161	North Dakota	United States	2012-04-24	4481	Verified	Website
441		162	Nevada	United States	2007-07-18	3431	Verified	Website
442		163	California	United States	2007-06-15	3431	Invalid	Website
443		164	British Columbia	Canada	2013-07-14	26	Verified	Website
444		165	Oregon	United States	2014-01-19	5904	Verified	Website
445		166	Oregon	United States	2013-04-27	6131	Verified	Website
446		167	Oregon	United States	2009-07-15	6131	Verified	Website
447		168	Washington	United States	2013-06-05	1767	Verified	Website
448		169	Idaho	United States	2012-06-02	3443	Verified	Website
449		170	California	United States	2012-09-22	6131	Verified	Website
450		172	Oregon	United States	2011-04-23	6131	Verified	Website
451		173	California	United States	2011-06-17	6131	Verified	Website
452		174	California	United States	2011-06-13	6131	Verified	Website
453		175	New Jersey	United States	2013-06-05	5469	Verified	Website
454		176	California	United States	2012-07-13	6131	Verified	Website
455		177	New Jersey	United States	2013-09-24	5469	Verified	Website
456		178	British Columbia	Canada	2012-06-03	150	Verified	Website
457		179	Florida	United States	2012-07-29	1183	Verified	Website
458		180	British Columbia	Canada	2010-08-07	150	Verified	Website
459		181	North Carolina	United States	2012-07-25	2737	Verified	Website
460		182	Texas	United States	2013-10-13	872	Verified	Website
461		184	California	United States	2013-03-22	4656	Invalid	Website
462		185	New York	United States	2013-08-17	3669	Verified	Website
463		187	Iowa	United States	2010-08-29	7	Verified	Website
464		188	Texas	United States	2011-07-06	3823	Verified	Website
465		191	Iowa	United States	2010-08-29	7	Verified	Website
466		192	Texas	United States	2011-07-04	3823	Verified	Website
467		193	California	United States	2013-12-29	4016	Verified	Website
468		194	Iowa	United States	2010-08-07	7	Verified	Website
469		195	Pennsylvania	United States	2013-04-24	4786	Verified	Website
470		198	Iowa	United States	2010-08-06	7	Verified	Website
471		199	Pennsylvania	United States	2013-05-06	4786	Verified	Website
472		200	California	United States	2014-01-12	4016	Verified	Website
473		201	Pennsylvania	United States	2013-04-30	4786	Verified	Website
474		202	Minnesota	United States	2009-07-26	7	Verified	Website
475		203	Minnesota	United States	2009-07-26	7	Verified	Website
476		204	Wisconsin	United States	2013-07-04	7814	Verified	Website
477		205	Montana	United States	2011-08-10	7	Verified	Website
478		206	Washington	United States	2013-08-13	975	Verified	Website
479		207	Washington	United States	2013-09-08	975	Verified	Website
480		208	Washington	United States	2013-08-22	975	Verified	Website
481		209	Ontario	Canada	2013-06-30	7396	Verified	Website
482		210	Ontario	Canada	2013-08-02	7396	Verified	Website
483		211	Ontario	Canada	2013-09-18	7396	Invalid	Website
484		212	Maine	United States	2013-07-25	2858	Verified	Website
485		213	Maine	United States	2013-07-24	2858	Verified	Website
486		214	Ontario	Canada	2013-08-10	7396	Verified	Website
487		215	Maine	United States	2013-07-24	2858	Verified	Website
488		216	Ontario	Canada	2013-07-30	7396	Verified	Website
489		218	Massachusetts	United States	2010-09-26	5818	Invalid	Website
490		219	Maine	United States	2013-07-24	2858	Verified	Website
491		221	Pennsylvania	United States	2013-07-24	7820	Verified	Website
492		222	Delaware	United States	2013-09-30	4286	Verified	Website
493		223	Texas	United States	2013-10-31	3548	Invalid	Website
494		224	California	United States	2014-01-22	4465	Verified	Website
495		225	Colorado	United States	2012-07-01	4733	Verified	Website
496		226	Quebec	Canada	2005-05-02	298	Verified	Website
497		227	Maine	United States	2013-08-20	4257	Verified	Website
498		228	Washington	United States	2014-01-22	6749	Verified	Website
499		229	Alberta	Canada	2012-07-10	2856	Verified	Website
500		230	Quebec	Canada	2008-07-07	298	Verified	Website
501		231	Nebraska	United States	2013-09-23	5725	Verified	Website
502		232	Nebraska	United States	2013-08-31	5725	Verified	Website
503		233	Quebec	Canada	2013-07-31	298	Verified	Website
504		234	Nebraska	United States	2013-08-12	5725	Verified	Website
505		235	Maine	United States	2011-07-11	6522	Verified	Website
506		236	Maine	United States	2012-07-09	6522	Verified	Website
507		237	Maine	United States	2012-07-09	6522	Verified	Website
508		238	Maine	United States	2012-07-09	6522	Verified	Website
509		239	Maine	United States	2012-07-09	6522	Verified	Website
510		240	California	United States	2014-01-22	2993	Verified	Website
511		241	Maine	United States	2012-07-09	6522	Verified	Website
512		242	Maine	United States	2012-07-09	6522	Verified	Website
513		243	Ontario	Canada	2013-07-24	1972	Verified	Website
514		244	Maine	United States	2011-07-16	6522	Verified	Website
515		245	Maine	United States	2011-07-16	6522	Verified	Website
516		246	Maine	United States	2011-07-16	6522	Verified	Website
517		247	Ontario	Canada	2013-08-14	1972	Verified	Website
518		248	Maine	United States	2011-07-16	6522	Verified	Website
519		249	Maine	United States	2011-07-18	6522	Verified	Website
520		250	Ontario	Canada	2013-09-16	1972	Verified	Website
521		251	Minnesota	United States	2013-07-30	7300	Verified	Website
522		252	Ontario	Canada	2013-09-17	1972	Invalid	Website
523		253	Minnesota	United States	2013-07-30	7300	Verified	Website
524		254	Minnesota	United States	2013-07-30	7300	Verified	Website
525		255	Ontario	Canada	2013-09-17	1972	Verified	Website
526		256	Ontario	Canada	2013-09-17	1972	Verified	Website
527		258	Ontario	Canada	2013-09-23	1972	Verified	Website
528		259	Massachusetts	United States	2010-04-13	5818	Verified	Website
529		261	Georgia	United States	2013-06-23	2546	Verified	Website
530		262	Minnesota	United States	2013-07-15	7300	Verified	Website
531		263	New Mexico	United States	2012-08-21	7016	Verified	Website
532		264	Georgia	United States	2013-06-23	2546	Verified	Website
533		265	Michigan	United States	2013-07-22	7300	Verified	Website
534		266	Oregon	United States	2013-09-23	6029	Verified	Website
535		267	Minnesota	United States	2012-06-17	7300	Verified	Website
536		270	Idaho	United States	2011-06-21	6098	Verified	Website
537		272	Wyoming	United States	2012-07-19	6850	Verified	Website
538		274	Oregon	United States	2010-06-17	1127	Verified	Website
539		275	Oregon	United States	2011-07-24	1127	Verified	Website
540		277	Ohio	United States	2013-08-07	3371	Verified	Website
541		279	Ohio	United States	2013-07-21	3371	Verified	Website
542		281	Massachusetts	United States	2013-09-20	5709	Verified	Website
543		282	Texas	United States	2013-11-02	1161	Verified	Website
544		283	Minnesota	United States	2012-05-14	3647	Verified	Website
545		286	Idaho	United States	2010-07-21	6098	Verified	Website
546		288	Idaho	United States	2013-09-11	6098	Verified	Website
547		289	Oregon	United States	2013-03-04	4008	Verified	Website
548		290	Idaho	United States	2013-09-11	6098	Verified	Website
549		292	Washington	United States	2012-05-28	3144	Verified	Website
550		293	Saskatchewan	Canada	2013-08-21	1712	Verified	Website
551		294	Washington	United States	2011-05-28	3144	Verified	Website
552		295	Washington	United States	2012-09-27	3144	Verified	Website
553		296	Washington	United States	2012-09-27	3144	Verified	Website
554		297	Oregon	United States	2013-06-25	3144	Verified	Website
555		298	Iowa	United States	2007-08-20	7359	Verified	Website
556		299	Oregon	United States	2013-03-28	4008	Verified	Website
557		300	Washington	United States	2013-07-10	3534	Verified	Website
558		301	Maine	United States	2012-07-13	6522	Verified	Website
559		302	Oregon	United States	2013-04-29	4008	Verified	Website
560		303	Maine	United States	2012-07-13	6522	Verified	Website
561		304	Maine	United States	2011-07-18	6522	Verified	Website
562		305	Washington	United States	2013-08-16	3534	Verified	Website
563		306	Maine	United States	2012-07-13	6522	Verified	Website
564		307	Maine	United States	2012-07-13	6522	Verified	Website
565		309	Oregon	United States	2013-04-29	4008	Verified	Website
566		310	Maine	United States	2012-07-13	6522	Verified	Website
567		311	Oregon	United States	2013-04-29	4008	Verified	Website
568		312	Maine	United States	2011-07-17	6522	Verified	Website
569		313	Maine	United States	2011-07-17	6522	Verified	Website
570		314	Maine	United States	2012-07-13	6522	Verified	Website
571		315	Oregon	United States	2013-04-30	4008	Verified	Website
572		316	California	United States	2011-04-04	2192	Verified	Website
573		317	California	United States	2012-02-22	2192	Verified	Website
574		318	California	United States	2013-07-30	2192	Verified	Website
575		319	Iowa	United States	2013-09-02	4628	Verified	Website
576		320	Oregon	United States	2013-05-05	4008	Verified	Website
577		321	Iowa	United States	2013-10-10	4628	Verified	Website
578		322	Iowa	United States	2012-06-30	4628	Verified	Website
579		323	Washington	United States	2013-05-17	3570	Verified	Website
580		324	Oregon	United States	2013-05-07	4008	Verified	Website
581		325	Oregon	United States	2013-05-14	4008	Verified	Website
582		326	Pennsylvania	United States	2013-05-17	4786	Verified	Website
583		327	Pennsylvania	United States	2013-07-20	4786	Verified	Website
584		328	Pennsylvania	United States	2013-11-06	4786	Verified	Website
585		329	Pennsylvania	United States	2013-07-29	4786	Verified	Website
586		330	Oregon	United States	2013-05-20	4008	Verified	Website
587		331	Oregon	United States	2013-05-20	4008	Verified	Website
588		332	California	United States	2014-01-25	4016	Verified	Website
589		333	California	United States	2014-01-25	4016	Verified	Website
590		334	Oregon	United States	2013-05-20	4008	Verified	Website
591		335	Oregon	United States	2013-05-26	4008	Verified	Website
592		336	Oregon	United States	2013-06-27	4008	Verified	Website
593		337	Oregon	United States	2013-07-01	4008	Verified	Website
594		340	Nevada	United States	2013-07-13	7916	Verified	Website
595		341	Oregon	United States	2013-07-05	4008	Verified	Website
596		342	Oregon	United States	2013-08-02	4008	Verified	Website
597		343	Oregon	United States	2013-08-06	4008	Verified	Website
598		344	California	United States	2012-03-24	6131	Verified	Website
599		345	Washington	United States	2012-06-03	3570	Verified	Website
600		346	New York	United States	2013-08-16	5672	Verified	Website
601		347	Ontario	Canada	2013-08-14	8251	Verified	Website
602		348	Washington	United States	2011-08-29	6261	Verified	Website
603		349	Michigan	United States	2013-08-13	4708	Verified	Website
604		350	Michigan	United States	2013-06-05	4708	Verified	Website
605		352	Washington	United States	2013-06-25	931	Verified	Website
606		353	Iowa	United States	2010-08-29	4628	Verified	Website
607		357	Maine	United States	2012-07-13	6522	Verified	Website
608		358	Alaska	United States	2013-07-25	2294	Verified	Website
609		359	Pennsylvania	United States	2013-07-25	7702	Verified	Website
610		360	Maine	United States	2012-07-13	6522	Verified	Website
611		361	Maine	United States	2012-07-12	6522	Verified	Website
612		362	Maine	United States	2012-06-09	6522	Verified	Website
613		363	Maine	United States	2012-06-08	6522	Verified	Website
614		364	Ontario	Canada	2013-08-01	1641	Verified	Website
615		365	Maine	United States	2010-07-23	6522	Verified	Website
616		366	Maine	United States	2010-07-23	6522	Verified	Website
617		367	Ontario	Canada	2012-06-16	1641	Verified	Website
618		368	Maine	United States	2009-05-12	6522	Verified	Website
619		369	Ontario	Canada	2012-09-01	1641	Verified	Website
620		370	Maine	United States	2008-06-18	6522	Verified	Website
621		371	Maine	United States	2007-08-01	6522	Verified	Website
622		372	Maine	United States	2012-07-13	6522	Verified	Website
623		374	Texas	United States	2009-05-14	6975	Verified	Website
624		375	Maine	United States	2013-07-12	6522	Verified	Website
625		376	Maine	United States	2013-07-12	6522	Verified	Website
626		377	Maine	United States	2013-07-12	6522	Verified	Website
627		378	Maine	United States	2013-07-12	6522	Verified	Website
628		380	Washington	United States	2012-06-07	3570	Verified	Website
629		381	Quebec	Canada	2007-04-25	298	Verified	Website
630		382	Quebec	Canada	2006-08-16	298	Verified	Website
631		383	Quebec	Canada	2007-04-28	298	Verified	Website
632		384	Quebec	Canada	2003-08-19	298	Verified	Website
633		385	Maine	United States	2008-08-02	6522	Verified	Website
634		386	Maine	United States	2009-05-13	6522	Verified	Website
635		387	Maine	United States	2009-05-13	6522	Verified	Website
636		388	Maine	United States	2012-05-19	6522	Verified	Website
637		389	Maine	United States	2012-07-26	6522	Verified	Website
638		390	Maine	United States	2013-07-09	6522	Verified	Website
639		391	Maine	United States	2013-07-11	6522	Verified	Website
640		392	Maine	United States	2011-07-18	6522	Verified	Website
641		393	Quebec	Canada	2003-08-30	298	Verified	Website
642		394	Quebec	Canada	2013-07-25	298	Verified	Website
643		395	Wisconsin	United States	2012-07-18	6877	Verified	Website
644		396	Ontario	Canada	2013-10-05	4212	Verified	Website
645		397	Maine	United States	2012-07-13	6522	Verified	Website
646		398	Maine	United States	2012-07-13	6522	Verified	Website
647		400	Ontario	Canada	2013-10-03	4212	Verified	Website
648		401	Washington	United States	2012-09-11	4675	Verified	Website
649		402	California	United States	2011-09-04	3872	Verified	Website
650		403	Washington	United States	2012-03-24	4675	Verified	Website
651		404	Maine	United States	2012-07-12	6522	Verified	Website
652		405	Maine	United States	2012-07-12	6522	Verified	Website
653		406	Maine	United States	2012-07-12	6522	Verified	Website
654		407	Maine	United States	2012-07-12	6522	Verified	Website
655		408	Montana	United States	2013-07-04	5596	Verified	Website
656		409	Montana	United States	2013-07-25	5596	Verified	Website
657		410	Montana	United States	2013-07-04	5596	Verified	Website
658		411	Ontario	Canada	2013-09-26	7249	Verified	Website
659		412	Ontario	Canada	2013-07-25	7249	Verified	Website
660		413	Ontario	Canada	2013-07-29	7249	Verified	Website
661		414	Ontario	Canada	2013-07-25	7249	Verified	Website
662		415	West Virginia	United States	2013-10-20	5687	Verified	Website
663		416	Ontario	Canada	2013-08-03	7249	Verified	Website
664		417	Ontario	Canada	2013-08-10	7249	Verified	Website
665		418	Ontario	Canada	2013-09-26	4212	Verified	Website
666		419	Washington	United States	2013-08-08	127	Verified	Website
667		420	Kentucky	United States	2013-08-12	2569	Verified	Website
668		421	Kentucky	United States	2013-08-12	2569	Verified	Website
669		422	Nova Scotia	Canada	2012-08-11	2404	Verified	Website
670		423	Maine	United States	2007-07-31	6522	Verified	Website
671		424	Maine	United States	2009-10-02	6522	Verified	Website
672		426	Maine	United States	2010-07-23	6522	Verified	Website
673		427	California	United States	2012-05-09	7548	Verified	Website
674		428	Maine	United States	2010-09-16	6522	Verified	Website
675		429	California	United States	2012-05-09	7548	Invalid	Website
676		430	Maine	United States	2010-06-16	6522	Verified	Website
677		431	California	United States	2012-05-09	7548	Verified	Website
678		432	Maine	United States	2012-07-12	6522	Verified	Website
679		433	California	United States	2012-05-09	7548	Verified	Website
680		434	Maine	United States	2013-07-13	6522	Verified	Website
681		435	Idaho	United States	2013-09-27	1226	Verified	Website
682		436	Oregon	United States	2012-05-15	8191	Verified	Website
683		437	Pennsylvania	United States	2013-06-20	7702	Verified	Website
684		438	Ontario	Canada	2013-10-03	4212	Verified	Website
685		439	Yukon	Canada	2011-07-09	7924	Verified	Website
686		440	Maine	United States	2010-08-07	6522	Verified	Website
687		441	Maine	United States	2010-09-16	6522	Verified	Website
688		442	Maine	United States	2010-08-27	6522	Verified	Website
689		443	Maine	United States	2013-07-09	6522	Verified	Website
690		444	California	United States	2013-07-16	1496	Verified	Website
691		445	Maine	United States	2013-08-12	6522	Verified	Website
692		446	Kansas	United States	2012-09-22	824	Invalid	Website
693		447	Kansas	United States	2013-09-21	824	Verified	Website
694		448	Kansas	United States	2013-09-21	824	Invalid	Website
695		449	Oregon	United States	2012-06-17	7342	Verified	Website
696		450	Maine	United States	2013-08-27	6522	Verified	Website
697		451	Maine	United States	2012-07-09	6522	Verified	Website
698		452	Maine	United States	2012-07-09	6522	Verified	Website
699		453	Maine	United States	2009-05-10	6522	Verified	Website
700		454	Maine	United States	2008-08-02	6522	Verified	Website
701		455	Maine	United States	2012-07-12	6522	Verified	Website
702		456	Indiana	United States	2013-07-06	4182	Verified	Website
703		457	Ontario	Canada	2013-10-03	4212	Verified	Website
704		458	Maine	United States	2013-07-09	5100	Invalid	Website
705		459	Pennsylvania	United States	2013-08-19	4786	Verified	Website
706		461	California	United States	2014-02-01	4016	Verified	Website
707		462	Pennsylvania	United States	2013-08-21	4786	Verified	Website
708		463	Pennsylvania	United States	2013-05-25	4786	Verified	Website
709		464	Pennsylvania	United States	2012-04-25	4786	Verified	Website
710		465	Pennsylvania	United States	2012-04-16	4786	Verified	Website
711		466	Pennsylvania	United States	2011-10-07	4786	Verified	Website
712		467	Pennsylvania	United States	2013-08-21	4786	Verified	Website
713		468	Nova Scotia	Canada	2013-07-06	1956	Verified	Website
714		469	Alberta	Canada	2012-07-24	2856	Verified	Website
715		470	Maine	United States	2010-07-28	1484	Verified	Website
716		471	Maine	United States	2010-07-05	1484	Invalid	Website
717		473	Alberta	Canada	2012-07-29	2856	Verified	Website
718		474	Alberta	Canada	2012-07-18	2856	Verified	Website
719		475	Alberta	Canada	2012-07-11	2856	Verified	Website
720		476	Alberta	Canada	2012-07-23	2856	Verified	Website
721		477	Maine	United States	2011-08-01	1484	Verified	Website
722		478	Washington	United States	2013-07-28	3570	Verified	Website
723		479	California	United States	2014-02-02	5622	Verified	Website
724		480	Oklahoma	United States	2013-10-01	7163	Verified	Website
725		481	California	United States	2013-12-15	1325	Verified	Website
726		482	Washington	United States	2013-08-08	4675	Verified	Website
727		483	Oklahoma	United States	2011-10-17	7163	Verified	Website
728		485	Oklahoma	United States	2011-10-17	7163	Verified	Website
729		486	California	United States	2014-01-15	126	Verified	Website
730		487	Oregon	United States	2007-06-17	1071	Verified	Website
731		488	Oregon	United States	2012-05-25	1071	Verified	Website
732		489	California	United States	2014-01-21	6996	Verified	Website
733		490	California	United States	2014-01-23	6996	Verified	Website
734		491	Iowa	United States	2013-05-17	6009	Verified	Website
735		492	Iowa	United States	2013-06-08	6009	Verified	Website
736		493	Iowa	United States	2013-05-17	6009	Verified	Website
737		494	Oklahoma	United States	2013-08-12	7163	Verified	Website
738		495	Oklahoma	United States	2013-08-22	7163	Verified	Website
739		496	Oklahoma	United States	2013-08-22	7163	Verified	Website
740		497	Oklahoma	United States	2013-08-22	7163	Verified	Website
741		498	Oklahoma	United States	2013-08-27	7163	Verified	Website
742		499	Oklahoma	United States	2013-08-14	7163	Verified	Website
743		500	Oklahoma	United States	2012-07-22	7163	Verified	Website
744		501	Iowa	United States	2013-07-17	6009	Verified	Website
745		503	Oregon	United States	2013-07-14	1267	Verified	Website
746		504	Oregon	United States	2013-06-16	1267	Verified	Website
747		505	Washington	United States	2011-06-26	1930	Verified	Website
748		506	Washington	United States	2011-06-25	1930	Verified	Website
749		507	Texas	United States	2013-10-01	1161	Verified	Website
750		508	Washington	United States	2011-06-25	1930	Verified	Website
751		509	Texas	United States	2013-10-09	1161	Verified	Website
752		510	Texas	United States	2013-10-09	1161	Verified	Website
753		511	Texas	United States	2013-10-09	1161	Verified	Website
754		512	Texas	United States	2013-10-19	1161	Verified	Website
755		513	Texas	United States	2013-10-19	1161	Verified	Website
756		514	Texas	United States	2013-10-19	1161	Verified	Website
757		515	Texas	United States	2013-10-19	1161	Verified	Website
758		516	Texas	United States	2013-10-19	1161	Verified	Website
759		517	Oklahoma	United States	2012-07-22	7163	Verified	Website
760		518	Oklahoma	United States	2012-07-22	7163	Verified	Website
761		519	Texas	United States	2013-09-07	1161	Verified	Website
762		520	Texas	United States	2013-08-24	1161	Verified	Website
763		521	Texas	United States	2013-08-24	1161	Verified	Website
764		523	Texas	United States	2013-08-24	1161	Verified	Website
765		524	Texas	United States	2013-07-27	1161	Verified	Website
766		525	Texas	United States	2013-07-20	1161	Verified	Website
767		526	Texas	United States	2013-07-21	1161	Verified	Website
768		527	Texas	United States	2013-07-11	1161	Verified	Website
769		528	Texas	United States	2013-07-07	1161	Verified	Website
770		529	Texas	United States	2013-07-01	1161	Verified	Website
771		530	Texas	United States	2013-07-01	1161	Verified	Website
772		531	Texas	United States	2013-06-21	1161	Verified	Website
773		532	Texas	United States	2013-06-21	1161	Verified	Website
774		533	Texas	United States	2013-06-24	1161	Verified	Website
775		534	Texas	United States	2013-06-24	1161	Verified	Website
776		535	Texas	United States	2013-06-21	1161	Verified	Website
777		536	Texas	United States	2013-05-01	1161	Verified	Website
778		537	Texas	United States	2013-04-17	1161	Verified	Website
779		538	Texas	United States	2013-04-17	1161	Verified	Website
780		539	Texas	United States	2013-04-17	1161	Verified	Website
781		540	Alberta	Canada	2012-07-18	2856	Verified	Website
782		541	Manitoba	Canada	2009-08-04	7334	Verified	Website
783		542	Alberta	Canada	2012-07-18	2856	Verified	Website
784		543	Manitoba	Canada	2013-09-29	7334	Verified	Website
785		544	Manitoba	Canada	2009-06-26	7334	Verified	Website
786		545	Manitoba	Canada	2013-09-29	7334	Verified	Website
787		546	Manitoba	Canada	2011-09-14	7334	Verified	Website
788		547	Texas	United States	2013-05-11	3823	Verified	Website
789		548	Texas	United States	2012-06-04	3823	Verified	Website
790		549	Texas	United States	2012-08-21	3823	Verified	Website
791		550	Texas	United States	2011-10-05	3823	Verified	Website
792		551	Texas	United States	2012-08-21	3823	Verified	Website
793		552	Texas	United States	2012-08-21	3823	Verified	Website
794		554	Texas	United States	2011-06-22	3823	Verified	Website
795		555	Texas	United States	2011-06-12	3823	Verified	Website
796		556	Texas	United States	2012-07-10	3823	Verified	Website
797		558	Texas	United States	2011-07-04	3823	Verified	Website
798		559	Massachusetts	United States	2013-11-16	7682	Verified	Website
799		560	Massachusetts	United States	2013-10-13	7682	Verified	Website
800		561	Texas	United States	2012-11-01	1161	Verified	Website
801		562	Texas	United States	2012-09-14	1161	Verified	Website
802		563	Alberta	Canada	2012-07-18	2856	Verified	Website
803		564	Alberta	Canada	2013-05-31	2856	Verified	Website
804		565	Alberta	Canada	2013-05-05	2856	Verified	Website
805		566	Alberta	Canada	2013-06-08	2856	Verified	Website
806		568	Washington	United States	2013-07-24	3570	Verified	Website
807		569	Michigan	United States	2013-08-01	7940	Verified	Website
808		570	Alberta	Canada	2012-06-25	2856	Verified	Website
809		571	Alberta	Canada	2013-05-03	2856	Invalid	Website
810		572	Alberta	Canada	2013-05-03	2856	Verified	Website
811		573	Alberta	Canada	2012-07-29	2856	Verified	Website
812		574	British Columbia	Canada	2013-10-06	2974	Verified	Website
813		575	Iowa	United States	2014-02-12	6009	Verified	Website
814		576	New York	United States	2013-08-20	3436	Verified	Website
815		577	New York	United States	2013-06-16	3436	Verified	Website
816		578	New York	United States	2013-05-15	3436	Verified	Website
817		579	Oregon	United States	2013-07-08	5886	Verified	Website
818		580	New York	United States	2006-09-07	3436	Verified	Website
819		581	New York	United States	2007-07-04	3436	Verified	Website
820		582	Oregon	United States	2013-07-08	5886	Verified	Website
821		583	New York	United States	2008-06-19	3436	Verified	Website
822		584	Quebec	Canada	2013-08-02	298	Verified	Website
823		585	Quebec	Canada	2008-10-04	298	Verified	Website
824		586	Washington	United States	2013-10-06	3570	Verified	Website
825		587	Oregon	United States	2013-07-01	5886	Verified	Website
826		588	Oregon	United States	2013-06-22	5886	Verified	Website
827		589	Oregon	United States	2013-06-22	5886	Invalid	Website
828		591	Maryland	United States	2013-07-12	5617	Verified	Website
829		592	Maryland	United States	2013-09-12	5617	Invalid	Website
830		593	Maryland	United States	2013-07-26	5617	Verified	Website
831		594	Maryland	United States	2013-07-21	5617	Verified	Website
832		595	Oregon	United States	2012-08-05	5886	Verified	Website
833		596	Oregon	United States	2013-07-01	5886	Verified	Website
834		597	Alaska	United States	2012-07-20	3572	Verified	Website
835		598	Texas	United States	2012-08-17	1161	Verified	Website
836		599	Oregon	United States	2014-02-13	5120	Verified	Website
837		600	Indiana	United States	2011-09-05	4182	Verified	Website
838		601	California	United States	2014-02-16	4016	Verified	Website
839		603	California	United States	2014-02-17	4656	Verified	Website
840		604	Wyoming	United States	2013-06-30	6158	Verified	Website
841		605	Wyoming	United States	2013-06-23	6158	Verified	Website
842		606	Wyoming	United States	2013-06-28	6158	Verified	Website
843		609	Wyoming	United States	2013-08-13	6158	Verified	Website
844		610	Wyoming	United States	2013-08-13	6158	Verified	Website
845		611	Quebec	Canada	2000-06-17	298	Verified	Website
846		612	New York	United States	2013-08-16	494	Invalid	Website
847		613	Quebec	Canada	2006-06-06	298	Verified	Website
848		614	New York	United States	2013-10-04	494	Verified	Website
849		615	Wisconsin	United States	2013-08-31	5490	Verified	Website
850		616	Wyoming	United States	2013-06-10	6158	Verified	Website
851		617	Wyoming	United States	2013-06-10	6158	Verified	Website
852		618	Ontario	Canada	2013-09-20	1279	Verified	Website
853		619	Ontario	Canada	2013-08-03	1279	Verified	Website
854		620	Ontario	Canada	2013-09-29	1279	Verified	Website
855		622	Wyoming	United States	2013-08-06	6158	Verified	Website
856		623	Washington	United States	2013-05-25	2269	Verified	Website
857		627	Wyoming	United States	2013-08-06	6158	Verified	Website
858		628	Washington	United States	2009-07-21	2269	Verified	Website
859		629	Wyoming	United States	2013-08-06	6158	Verified	Website
860		630	Wyoming	United States	2013-08-06	6158	Verified	Website
861		631	Washington	United States	2009-07-21	2269	Verified	Website
862		632	Washington	United States	2011-08-18	2269	Verified	Website
863		633	Wyoming	United States	2013-08-06	6158	Invalid	Website
864		634	Washington	United States	2011-08-18	2269	Verified	Website
865		635	Wyoming	United States	2013-08-06	6158	Verified	Website
866		636	Washington	United States	2011-06-10	2269	Verified	Website
867		637	Washington	United States	2011-06-10	2269	Verified	Website
868		638	Washington	United States	2012-09-14	2269	Verified	Website
869		639	Washington	United States	2013-06-14	2269	Verified	Website
870		640	Wyoming	United States	2013-08-06	6158	Verified	Website
871		641	Wyoming	United States	2013-08-06	6158	Verified	Website
872		642	Wyoming	United States	2013-08-06	6158	Verified	Website
873		643	Wyoming	United States	2013-08-06	6158	Verified	Website
874		644	California	United States	2014-02-23	4016	Verified	Website
875		645	Oregon	United States	2012-07-13	1071	Verified	Website
876		646	Oregon	United States	2013-08-10	7889	Verified	Website
877		648	Oregon	United States	2013-07-01	7889	Verified	Website
878		649	Quebec	Canada	2013-07-06	298	Verified	Website
879		651	California	United States	2007-07-06	1846	Verified	Website
880		652	Quebec	Canada	2012-04-19	298	Verified	Website
881		653	Wyoming	United States	2012-09-22	6158	Verified	Website
882		654	Wyoming	United States	2012-09-22	6158	Verified	Website
883		655	Wyoming	United States	2012-09-22	6158	Verified	Website
884		656	California	United States	2014-03-01	2286	Verified	Website
885		657	Oregon	United States	2014-03-01	5886	Invalid	Website
886		658	Wyoming	United States	2013-08-01	6158	Verified	Website
887		661	Wyoming	United States	2013-09-05	6158	Verified	Website
888		662	Wyoming	United States	2013-09-07	6158	Verified	Website
889		663	Wyoming	United States	2013-09-07	6158	Verified	Website
890		664	Wyoming	United States	2013-09-07	6158	Verified	Website
891		665	Saskatchewan	Canada	2013-07-15	7364	Verified	Website
892		666	Minnesota	United States	2011-07-17	7364	Verified	Website
893		667	Minnesota	United States	2011-07-14	7364	Verified	Website
894		668	Minnesota	United States	2013-07-30	7364	Verified	Website
895		669	Wisconsin	United States	2013-06-28	5851	Verified	Website
896		670	Montana	United States	2012-05-14	5851	Verified	Website
897		672	Montana	United States	2012-05-14	5851	Verified	Website
898		673	Wisconsin	United States	2013-06-29	5851	Verified	Website
899		674	Wisconsin	United States	2013-07-01	5851	Verified	Website
900		675	California	United States	2014-03-05	2993	Invalid	Website
901		676	California	United States	2014-03-05	2993	Invalid	Website
902		677	Wisconsin	United States	2013-07-15	5851	Verified	Website
903		680	Wisconsin	United States	2013-07-20	5851	Verified	Website
904		681	Wisconsin	United States	2013-07-21	5851	Verified	Website
905		682	Ontario	Canada	2013-08-18	6400	Verified	Website
906		683	California	United States	2014-03-06	7134	Verified	Website
907		684	California	United States	2014-03-06	7134	Verified	Website
908		685	Idaho	United States	2013-07-12	6001	Verified	Website
909		686	Idaho	United States	2013-08-26	6001	Verified	Website
910		687	Idaho	United States	2013-08-02	6001	Invalid	Website
911		688	Ontario	Canada	2012-09-20	6845	Verified	Website
912		690	Wisconsin	United States	2013-07-25	8048	Verified	Website
913		691	Wisconsin	United States	2013-08-11	8048	Verified	Website
914		694	Wisconsin	United States	2013-07-21	5851	Verified	Website
915		695	Wisconsin	United States	2013-08-23	5851	Verified	Website
916		696	Wisconsin	United States	2013-08-23	5851	Verified	Website
917		697	Wisconsin	United States	2013-08-23	5851	Verified	Website
918		698	Wisconsin	United States	2012-05-30	5851	Verified	Website
919		699	California	United States	2014-03-08	2286	Verified	Website
920		700	Wisconsin	United States	2013-05-30	8048	Verified	Website
921		701	California	United States	2014-03-09	7746	Invalid	Website
922		702	Arizona	United States	2014-03-09	1240	Invalid	Website
923		703	Washington	United States	2014-03-09	4675	Verified	Website
924		704	Washington	United States	2014-03-09	4675	Verified	Website
925		705	California	United States	2014-03-05	7814	Verified	Website
926		706	California	United States	2014-03-05	7814	Verified	Website
927		707	California	United States	2014-02-10	4656	Verified	Website
928		708	Nebraska	United States	2007-09-15	6481	Invalid	Website
929		709	Nebraska	United States	2007-09-15	6481	Invalid	Website
930		710	Georgia	United States	2014-03-11	5228	Invalid	Website
931		712	Georgia	United States	2014-03-11	5228	Invalid	Website
932		713	Oregon	United States	2014-03-11	4008	Verified	Website
933		714	Georgia	United States	2014-03-11	5228	Invalid	Website
934		715	California	United States	2014-03-11	2993	Invalid	Website
935		716	California	United States	2014-03-11	2993	Invalid	Website
936		718	Washington	United States	2014-03-11	5861	Verified	Website
937		719	Washington	United States	2014-03-12	1151	Verified	Website
938		720	Oregon	United States	2014-03-12	6113	Verified	Website
939		721	Oregon	United States	2014-03-12	6113	Verified	Website
940		722	Idaho	United States	2014-03-12	3703	Verified	Website
941		724	Texas	United States	2013-10-07	4615	Verified	Website
942		725	Texas	United States	2013-10-07	4615	Verified	Website
943		726	Texas	United States	2013-10-07	4615	Invalid	Website
944		727	Oregon	United States	2014-03-12	5121	Verified	Website
945		728	Oregon	United States	2014-03-12	5121	Verified	Website
946		729	Oregon	United States	2014-03-07	4513	Verified	Website
947		730	Washington	United States	2014-03-12	7126	Verified	Website
948		731	Oregon	United States	2014-03-13	4008	Verified	Website
949		732	Oregon	United States	2014-03-13	4008	Verified	Website
950		733	Illinois	United States	2011-08-28	6893	Verified	Website
951		734	Illinois	United States	2009-08-23	6893	Verified	Website
952		735	Quebec	Canada	2005-07-12	298	Verified	Website
953		736	Minnesota	United States	2013-09-12	6781	Invalid	Website
954		737	Wyoming	United States	2012-05-15	2557	Verified	Website
955		738	Washington	United States	2014-03-13	7344	Verified	Website
956		739	Washington	United States	2014-03-15	1930	Verified	Website
957		740	Washington	United States	2014-03-15	1930	Verified	Website
958		741	Oregon	United States	2014-03-16	4008	Verified	Website
959		742	Minnesota	United States	2013-08-02	7300	Verified	Website
960		743	California	United States	2014-03-17	2286	Verified	Website
961		744	Alberta	Canada	2012-07-26	2856	Verified	Website
962		745	California	United States	2014-03-15	2993	Invalid	Website
963		746	California	United States	2014-03-15	2993	Verified	Website
964		748	California	United States	2014-03-16	2993	Invalid	Website
965		749	California	United States	2014-03-17	4806	Verified	Website
966		750	California	United States	2014-03-17	4806	Verified	Website
967		751	Michigan	United States	2013-07-30	8387	Verified	Website
968		752	California	United States	2004-08-01	8254	Verified	Website
969		753	California	United States	2004-03-05	8254	Verified	Website
970		754	California	United States	2004-08-25	8254	Verified	Website
971		755	Minnesota	United States	2013-08-21	7300	Verified	Website
972		756	Oregon	United States	2014-03-18	3580	Verified	Website
973		757	California	United States	2014-03-20	7806	Invalid	Website
974		758	California	United States	2014-03-20	7806	Invalid	Website
975		759	South Carolina	United States	2013-07-21	8050	Verified	Website
976		760	South Carolina	United States	2013-10-12	8050	Verified	Website
977		761	Ohio	United States	2013-07-06	908	Invalid	Website
978		762	Vermont	United States	2013-08-09	908	Invalid	Website
979		763	Ohio	United States	2013-07-04	908	Invalid	Website
980		765	Washington	United States	2014-03-20	5861	Invalid	Website
981		766	Washington	United States	2014-03-18	8047	Verified	Website
982		767	Georgia	United States	2014-03-20	6212	Invalid	Website
983		768	California	United States	2014-03-21	4806	Verified	Website
984		769	Washington	United States	2014-03-21	7951	Verified	Website
985		770	South Carolina	United States	2008-07-03	8050	Verified	Website
986		771	California	United States	2014-03-20	535	Verified	Website
987		772	Maine	United States	2011-08-01	579	Verified	Website
988		773	California	United States	2014-03-22	535	Verified	Website
989		774	Washington	United States	2014-03-22	7723	Verified	Website
990		775	Washington	United States	2014-03-22	7723	Verified	Website
991		776	Oregon	United States	2014-03-22	32	Verified	Website
992		777	Oregon	United States	2014-03-22	4008	Verified	Website
993		778	California	United States	2014-03-22	6997	Invalid	Website
994		779	Connecticut	United States	2013-07-27	6808	Verified	Website
995		780	Rhode Island	United States	2011-04-24	6808	Verified	Website
996		781	California	United States	2014-03-15	5616	Invalid	Website
997		782	Washington	United States	2014-03-22	74	Verified	Website
998		783	California	United States	2014-03-22	5791	Verified	Website
999		784	California	United States	2010-07-27	8254	Verified	Website
1000		785	California	United States	2014-03-22	4957	Invalid	Website
1001		786	California	United States	2007-07-06	8254	Verified	Website
1002		787	South Carolina	United States	2010-10-23	8050	Invalid	Website
1003		788	Georgia	United States	2014-03-23	7403	Invalid	Website
1004		789	British Columbia	Canada	2014-03-24	7138	Verified	Website
1005		790	California	United States	2014-03-23	4016	Verified	Website
1006		791	Florida	United States	2014-03-08	2257	Invalid	Website
1007		792	Nevada	United States	2014-03-16	2268	Invalid	Website
1008		793	California	United States	2014-03-24	7342	Invalid	Website
1009		794	California	United States	2014-03-24	7342	Invalid	Website
1010		795	Washington	United States	2014-03-24	2416	Verified	Website
1011		796	Maine	United States	2012-08-02	244	Verified	Website
1012		797	Maine	United States	2013-06-02	244	Verified	Website
1013		798	British Columbia	Canada	2014-03-13	1385	Invalid	Website
1014		800	California	United States	2014-03-01	3970	Invalid	Website
1015		801	South Carolina	United States	2014-03-23	2384	Verified	Website
1016		802	Pennsylvania	United States	2013-07-04	5241	Verified	Website
1017		803	Connecticut	United States	2013-10-15	7839	Verified	Website
1018		804	Washington	United States	2014-03-26	5700	Verified	Website
1019		805	Michigan	United States	2013-06-14	7750	Verified	Website
1020		806	Michigan	United States	2013-06-14	7750	Verified	Website
1021		808	Pennsylvania	United States	2013-07-24	8153	Verified	Website
1022		809	California	United States	2013-06-14	6851	Invalid	Website
1023		810	Georgia	United States	2014-03-21	8149	Invalid	Website
1024		811	California	United States	2014-03-29	535	Verified	Website
1025		812	Colorado	United States	2014-03-30	7181	Verified	Website
1026		813	South Carolina	United States	2014-03-30	2384	Invalid	Website
1027		814	Washington	United States	2013-08-15	5755	Verified	Website
1028		817	Washington	United States	2013-08-08	2102	Verified	Website
1029		818	Washington	United States	2013-07-08	2102	Verified	Website
1030		819	Washington	United States	2013-07-10	2102	Verified	Website
1031		820	Washington	United States	2013-07-10	2102	Verified	Website
1032		822	Washington	United States	2013-08-04	2102	Verified	Website
1033		823	Washington	United States	2013-08-08	2102	Verified	Website
1034		824	Washington	United States	2013-08-13	2102	Verified	Website
1035		827	Oregon	United States	2014-03-30	1127	Verified	Website
1036		829	British Columbia	Canada	2014-04-01	4972	Invalid	Website
1037		830	Alberta	Canada	2008-09-08	2856	Verified	Website
1038		831	British Columbia	Canada	2014-03-24	2856	Verified	Website
1039		832	New York	United States	2013-09-10	4861	Verified	Website
1040		834	California	United States	2014-04-02	2067	Verified	Website
1041		835	Oregon	United States	2014-04-02	6903	Verified	Website
1042		836	California	United States	2014-04-02	6184	Verified	Website
1043		837	Pennsylvania	United States	2013-08-21	7569	Verified	Website
1044		838	Maine	United States	2012-07-17	244	Verified	Website
1045		839	Maine	United States	2012-07-23	244	Verified	Website
1046		841	Maine	United States	2012-09-01	244	Verified	Website
1047		842	Maine	United States	2013-07-31	244	Verified	Website
1048		843	Maine	United States	2013-07-31	244	Verified	Website
1049		844	Maine	United States	2012-10-08	244	Verified	Website
1050		845	Maine	United States	2012-07-01	244	Verified	Website
1051		846	Maine	United States	2013-07-17	244	Verified	Website
1052		847	Maine	United States	2013-07-31	244	Verified	Website
1053		848	Maine	United States	2013-07-31	244	Verified	Website
1054		849	Maine	United States	2013-08-01	244	Verified	Website
1055		850	Maine	United States	2005-07-15	244	Verified	Website
1056		851	Maine	United States	2012-07-17	244	Verified	Website
1057		852	Texas	United States	2014-04-02	3876	Invalid	Website
1058		853	Washington	United States	2014-04-04	2033	Verified	Website
1059		854	Washington	United States	2014-03-14	2333	Verified	Website
1060		855	Washington	United States	2014-03-14	2333	Verified	Website
1061		856	Florida	United States	2014-04-05	7996	Verified	Website
1062		857	California	United States	2014-04-05	1588	Verified	Website
1063		858	Utah	United States	2013-06-03	7965	Invalid	Website
1064		859	California	United States	2014-04-03	4656	Verified	Website
1065		860	Utah	United States	2013-08-25	7965	Verified	Website
1066		861	North Carolina	United States	2014-04-05	6909	Invalid	Website
1067		862	California	United States	2014-03-22	798	Verified	Website
1068		863	California	United States	2014-04-06	4656	Verified	Website
1069		864	California	United States	2014-03-21	798	Verified	Website
1070		865	California	United States	2014-04-06	4656	Verified	Website
1071		866	Washington	United States	2014-04-06	713	Tentative	Website
1072		868	Virginia	United States	2012-06-12	239	Verified	Website
1073		869	Virginia	United States	2012-06-12	239	Verified	Website
1074		870	Virginia	United States	2012-06-14	239	Verified	Website
1075		871	Virginia	United States	2012-06-14	239	Verified	Website
1076		872	Virginia	United States	2012-06-17	239	Verified	Website
1077		873	Virginia	United States	2012-06-08	239	Verified	Website
1078		874	Virginia	United States	2011-06-10	239	Verified	Website
1079		875	Washington	United States	2014-04-07	4898	Verified	Website
1080		876	California	United States	2014-04-07	4656	Verified	Website
1081		877	California	United States	2014-04-07	535	Verified	Website
1082		878	Washington	United States	2013-05-16	7186	Verified	Website
1083		879	Washington	United States	2013-07-31	7186	Verified	Website
1084		880	Virginia	United States	2012-05-11	239	Verified	Website
1085		881	Virginia	United States	2012-06-11	239	Verified	Website
1086		882	California	United States	2014-04-06	6910	Verified	Website
1087		883	California	United States	2014-04-08	535	Verified	Website
1088		884	California	United States	2014-04-08	4721	Invalid	Website
1089		885	British Columbia	Canada	2014-04-08	8262	Verified	Website
1090		886	British Columbia	Canada	2014-04-08	8262	Verified	Website
1091		887	Oregon	United States	2014-04-09	6016	Invalid	Website
1092		888	Oregon	United States	2014-04-09	6016	Verified	Website
1093		889	Washington	United States	2014-04-08	4099	Tentative	Website
1094		890	California	United States	2014-04-09	4721	Invalid	Website
1095		891	Tennessee	United States	2014-04-09	7696	Verified	Website
1096		892	Oregon	United States	2014-04-09	4008	Verified	Website
1097		893	California	United States	2014-04-09	3751	Invalid	Website
1098		894	British Columbia	Canada	2014-04-09	956	Verified	Website
1099		895	Idaho	United States	2014-04-09	3853	Invalid	Website
1100		896	North Carolina	United States	2014-04-10	532	Invalid	Website
1101		897	Indiana	United States	2014-04-10	6308	Verified	Website
1102		898	Maine	United States	2011-08-09	244	Verified	Website
1103		899	Maine	United States	2012-07-17	244	Verified	Website
1104		900	Kentucky	United States	2014-04-10	447	Invalid	Website
1105		901	Oregon	United States	2014-04-06	7022	Verified	Website
1106		902	Louisiana	United States	2014-04-11	6981	Verified	Website
1107		903	Pennsylvania	United States	2014-04-10	4786	Verified	Website
1108		904	Maine	United States	2013-07-18	244	Verified	Website
1109		905	California	United States	2014-04-11	535	Verified	Website
1110		906	California	United States	2014-04-11	535	Verified	Website
1111		907	Kansas	United States	2014-04-11	7709	Verified	Website
1112		908	Texas	United States	2013-08-09	8377	Verified	Website
1113		909	Virginia	United States	2012-07-23	239	Verified	Website
1114		910	Virginia	United States	2012-06-13	239	Verified	Website
1115		911	Indiana	United States	2014-04-12	6308	Invalid	Website
1116		912	Idaho	United States	2014-04-10	6946	Verified	Website
1117		913	New York	United States	2014-04-12	494	Verified	Website
1118		914	Virginia	United States	2014-04-12	239	Verified	Website
1119		915	Virginia	United States	2014-04-11	239	Verified	Website
1120		916	British Columbia	Canada	2014-04-12	3402	Verified	Website
1121		917	Virginia	United States	2014-04-12	4462	Verified	Website
1122		918	Virginia	United States	2014-04-12	4462	Verified	Website
1123		920	Florida	United States	2014-04-13	5221	Invalid	Website
1124		921	Montana	United States	2013-07-02	7799	Verified	Website
1125		922	South Carolina	United States	2014-04-13	8198	Invalid	Website
1126		923	Oregon	United States	2014-04-13	4008	Verified	Website
1127		924	Louisiana	United States	2014-04-13	6981	Invalid	Website
1128		925	Oregon	United States	2014-04-13	4008	Verified	Website
1129		926	Ohio	United States	2014-04-13	1961	Invalid	Website
1130		927	Washington	United States	2014-04-13	1930	Verified	Website
1131		928	Washington	United States	2014-04-13	1319	Verified	Website
1132		929	British Columbia	Canada	2014-04-11	875	Verified	Website
1133		930	British Columbia	Canada	2014-04-11	875	Verified	Website
1134		932	New Jersey	United States	2014-04-13	4067	Invalid	Website
1135		937	Washington	United States	2014-04-13	2333	Invalid	Website
1136		938	British Columbia	Canada	2014-04-13	8294	Verified	Website
1137		939	Washington	United States	2014-04-13	8144	Verified	Website
1138		940	California	United States	2014-04-12	1784	Verified	Website
1139		941	British Columbia	Canada	2014-04-13	3402	Verified	Website
1140		943	New York	United States	2013-07-26	3436	Invalid	Website
1141		945	Washington	United States	2014-04-13	25	Verified	Website
1142		946	Oregon	United States	2014-04-13	5707	Verified	Website
1143		947	Massachusetts	United States	2014-04-14	7656	Invalid	Website
1144		948	Virginia	United States	2014-04-02	4166	Verified	Website
1145		950	Connecticut	United States	2014-04-12	679	Verified	Website
1146		951	Oregon	United States	2014-03-11	1870	Verified	Website
1147		952	South Carolina	United States	2014-04-14	2806	Invalid	Website
1148		953	Nevada	United States	2012-12-06	3506	Verified	Website
1149		955	Idaho	United States	2014-04-14	3241	Verified	Website
1150		956	Idaho	United States	2014-04-14	1758	Verified	Website
1151		957	Virginia	United States	2014-04-11	4517	Verified	Website
1152		958	Virginia	United States	2014-04-14	4600	Verified	Website
1153		959	Idaho	United States	2014-04-14	5535	Verified	Website
1154		960	California	United States	2014-04-14	6910	Verified	Website
1155		961	California	United States	2014-04-14	6910	Verified	Website
1156		962	Missouri	United States	2014-04-16	8443	Verified	Website
1157		964	California	United States	2014-04-07	880	Verified	Website
1158		965	California	United States	2014-04-09	880	Invalid	Website
1159		966	California	United States	2014-04-10	880	Invalid	Website
1160		967	Oregon	United States	2014-04-16	5446	Invalid	Website
1161		970	Oregon	United States	2014-04-16	8438	Invalid	Website
1162		972	New York	United States	2014-04-12	3669	Verified	Website
1163		973	Oregon	United States	2014-04-15	1202	Verified	Website
1164		974	California	United States	2014-04-11	4239	Verified	Website
1165		975	Idaho	United States	2014-04-16	3241	Verified	Website
1166		976	Oregon	United States	2013-05-27	4692	Verified	Website
1167		977	New York	United States	2013-07-03	4692	Verified	Website
1168		978	Indiana	United States	2014-04-04	7614	Invalid	Website
1169		979	Indiana	United States	2014-04-17	7614	Verified	Website
1170		980	British Columbia	Canada	2014-04-06	7249	Verified	Website
1171		981	California	United States	2014-04-17	5427	Verified	Website
1172		983	Michigan	United States	2014-04-17	1165	Verified	Website
1173		984	Oregon	United States	2014-04-17	7324	Verified	Website
1174		985	Wisconsin	United States	2010-08-30	1027	Verified	Website
1175		988	California	United States	2014-04-13	8027	Verified	Website
1176		989	California	United States	2014-04-18	7134	Verified	Website
1177		990	Ohio	United States	2014-04-17	8036	Verified	Website
1178		991	Connecticut	United States	2014-04-18	7778	Invalid	Website
1179		992	Alabama	United States	2014-04-17	7279	Invalid	Website
1180		993	Pennsylvania	United States	2014-04-18	8112	Invalid	Website
1181		994	Oklahoma	United States	2014-04-16	6000	Verified	Website
1182		995	California	United States	2014-04-16	7260	Invalid	Website
1183		996	Oregon	United States	2014-04-18	1253	Invalid	Website
1184		997	Oregon	United States	2014-04-18	1039	Verified	Website
1185		998	Oregon	United States	2014-04-09	737	Verified	Website
1186		999	Oregon	United States	2014-04-11	737	Verified	Website
1187		1002	Florida	United States	2014-04-04	4629	Verified	Website
1188		1003	California	United States	2014-04-18	7004	Verified	Website
1189		1004	Oregon	United States	2014-04-18	1870	Verified	Website
1190		1005	Oregon	United States	2014-04-18	1870	Verified	Website
1191		1006	Pennsylvania	United States	2014-04-19	5352	Verified	Website
1192		1007	Pennsylvania	United States	2014-04-19	5352	Verified	Website
1193		1008	Pennsylvania	United States	2014-04-19	5352	Invalid	Website
1194		1009	Pennsylvania	United States	2014-04-19	5352	Verified	Website
1195		1010	New York	United States	2014-04-17	540	Verified	Website
1196		1011	British Columbia	Canada	2014-04-18	2774	Verified	Website
1197		1012	Maryland	United States	2014-04-19	43	Invalid	Website
1198		1013	Virginia	United States	2014-04-19	7204	Verified	Website
1199		1014	Indiana	United States	2014-04-19	4893	Invalid	Website
1200		1016	California	United States	2014-04-19	7025	Invalid	Website
1201		1017	Oregon	United States	2014-04-19	2678	Verified	Website
1202		1018	Texas	United States	2014-04-19	1161	Verified	Website
1203		1019	Texas	United States	2013-08-13	7891	Verified	Website
1204		1020	Texas	United States	2013-08-27	7891	Verified	Website
1205		1021	Pennsylvania	United States	2014-04-19	4786	Verified	Website
1206		1022	California	United States	2014-03-07	3019	Verified	Website
1207		1024	British Columbia	Canada	2014-04-06	2483	Invalid	Website
1208		1025	British Columbia	Canada	2014-04-13	4839	Invalid	Website
1209		1026	Virginia	United States	2014-04-20	90	Invalid	Website
1210		1027	Ontario	Canada	2014-04-20	5021	Verified	Website
1211		1028	Wyoming	United States	2013-05-07	6801	Verified	Website
1212		1029	Illinois	United States	2014-04-20	8049	Verified	Website
1213		1030	Pennsylvania	United States	2014-04-20	4181	Verified	Website
1214		1031	New York	United States	2014-04-20	4848	Verified	Website
1215		1032	British Columbia	Canada	2014-04-20	6962	Verified	Website
1216		1033	Michigan	United States	2014-04-20	8288	Verified	Website
1217		1034	Oregon	United States	2014-04-20	3277	Verified	Website
1218		1035	Oregon	United States	2014-04-20	3277	Verified	Website
1219		1036	Tennessee	United States	2014-04-20	7545	Invalid	Website
1220		1037	Alabama	United States	2014-04-20	7754	Verified	Website
1221		1038	Ohio	United States	2014-04-20	8399	Verified	Website
1222		1039	Washington	United States	2014-04-20	4685	Verified	Website
1223		1040	Washington	United States	2014-03-24	5861	Verified	Website
1224		1041	New York	United States	2014-04-20	2172	Verified	Website
1225		1042	Washington	United States	2014-03-24	5861	Verified	Website
1226		1043	Washington	United States	2014-04-02	5861	Invalid	Website
1227		1044	Washington	United States	2014-04-20	5861	Invalid	Website
1228		1045	Washington	United States	2014-04-02	5861	Invalid	Website
1229		1046	Washington	United States	2014-04-20	5861	Invalid	Website
1230		1047	California	United States	2014-04-19	8027	Verified	Website
1231		1048	Oregon	United States	2014-04-19	2050	Verified	Website
1232		1049	Oregon	United States	2014-04-19	4741	Invalid	Website
1233		1050	Michigan	United States	2014-04-21	5114	Verified	Website
1234		1052	Oregon	United States	2014-04-21	7889	Invalid	Website
1235		1054	Iowa	United States	2014-04-20	2337	Invalid	Website
1236		1055	California	United States	2014-04-21	535	Verified	Website
1237		1057	Washington	United States	2011-07-19	8173	Verified	Website
1238		1058	Washington	United States	2011-07-19	8173	Verified	Website
1239		1059	Washington	United States	2011-07-19	8173	Invalid	Website
1240		1060	Washington	United States	2014-04-04	8173	Verified	Website
1241		1061	Washington	United States	2014-04-02	8173	Verified	Website
1242		1062	Texas	United States	2013-10-24	7891	Invalid	Website
1243		1063	Virginia	United States	2014-04-22	7948	Invalid	Website
1244		1064	Pennsylvania	United States	2014-04-21	4786	Verified	Website
1245		1065	Oregon	United States	2014-04-20	4008	Verified	Website
1246		1066	Oregon	United States	2014-04-20	4008	Verified	Website
1247		1067	Oregon	United States	2014-04-21	4008	Verified	Website
1248		1068	Oregon	United States	2014-04-21	4008	Verified	Website
1249		1069	Idaho	United States	2013-09-22	4784	Verified	Website
1250		1070	Idaho	United States	2013-09-22	4784	Verified	Website
1251		1072	Oregon	United States	2014-04-20	6195	Verified	Website
1252		1073	Oregon	United States	2014-04-22	6729	Verified	Website
1253		1074	Indiana	United States	2014-04-22	6308	Verified	Website
1254		1075	Oregon	United States	2014-04-22	6016	Invalid	Website
1255		1076	Louisiana	United States	2014-04-22	6981	Invalid	Website
1256		1077	Washington	United States	2014-04-07	8173	Verified	Website
1257		1078	Oregon	United States	2014-04-22	6016	Invalid	Website
1258		1079	Michigan	United States	2014-04-19	1165	Invalid	Website
1259		1080	Virginia	United States	2014-04-22	2441	Invalid	Website
1260		1081	Alabama	United States	2014-04-22	7620	Verified	Website
1261		1082	Alabama	United States	2014-04-22	6238	Verified	Website
1262		1083	Alabama	United States	2014-04-19	6238	Verified	Website
1263		1084	Virginia	United States	2014-04-22	4971	Invalid	Website
1264		1085	Texas	United States	2014-04-22	7891	Verified	Website
1265		1086	Ontario	Canada	2013-08-26	784	Verified	Website
1266		1087	Ontario	Canada	2013-08-26	784	Invalid	Website
1267		1088	North Carolina	United States	2014-04-23	6994	Invalid	Website
1268		1090	Massachusetts	United States	2014-04-22	3606	Verified	Website
1269		1091	California	United States	2014-04-22	8027	Verified	Website
1270		1093	Pennsylvania	United States	2013-08-10	4882	Verified	Website
1271		1096	Oregon	United States	2014-04-15	2897	Verified	Website
1272		1097	New York	United States	2014-04-21	3612	Verified	Website
1273		1098	Oregon	United States	2014-04-18	7591	Verified	Website
1274		1099	South Carolina	United States	2014-04-23	6578	Invalid	Website
1275		1100	Texas	United States	2014-04-23	7891	Verified	Website
1276		1101	Oregon	United States	2014-04-21	3277	Verified	Website
1277		1102	California	United States	2014-04-24	5791	Verified	Website
1278		1103	Texas	United States	2014-04-23	3823	Verified	Website
1279		1104	Texas	United States	2014-04-23	3823	Verified	Website
1280		1105	Texas	United States	2014-04-23	3823	Verified	Website
1281		1106	Texas	United States	2014-04-18	3823	Verified	Website
1282		1107	Tennessee	United States	2014-04-24	5220	Invalid	Website
1283		1108	Massachusetts	United States	2014-04-24	1066	Verified	Website
1284		1109	Georgia	United States	2014-04-24	6987	Invalid	Website
1285		1110	California	United States	2014-04-22	3411	Verified	Website
1286		1111	Nova Scotia	Canada	2011-10-05	7915	Invalid	Website
1287		1112	Indiana	United States	2014-04-11	7555	Invalid	Website
1288		1113	Texas	United States	2014-04-19	5878	Invalid	Website
1289		1114	Washington	United States	2014-04-25	1930	Verified	Website
1290		1115	Washington	United States	2014-04-25	1930	Verified	Website
1291		1116	Washington	United States	2014-04-25	5861	Verified	Website
1292		1117	Virginia	United States	2014-04-18	7893	Invalid	Website
1293		1118	Utah	United States	2014-04-25	2647	Verified	Website
1294		1119	British Columbia	Canada	2014-04-25	6962	Verified	Website
1295		1120	Florida	United States	2014-04-23	7344	Invalid	Website
1296		1121	New Jersey	United States	2014-04-26	4067	Verified	Website
1297		1122	Tennessee	United States	2014-04-26	5220	Invalid	Website
1298		1123	Oregon	United States	2014-04-25	1076	Invalid	Website
1299		1124	Maryland	United States	2014-04-26	384	Invalid	Website
1300		1125	Oregon	United States	2014-04-26	3346	Invalid	Website
1301		1126	Virginia	United States	2014-04-19	7893	Invalid	Website
1302		1127	Idaho	United States	2014-04-14	1151	Verified	Website
1303		1128	Washington	United States	2013-09-02	6145	Verified	Website
1304		1129	Oregon	United States	2014-04-25	4138	Invalid	Website
1305		1131	Maryland	United States	2014-04-26	2968	Invalid	Website
1306		1132	Maryland	United States	2014-04-26	2968	Verified	Website
1307		1133	Illinois	United States	2014-04-26	6252	Invalid	Website
1308		1136	Texas	United States	2014-04-19	6332	Invalid	Website
1309		1137	Texas	United States	2014-04-25	1161	Verified	Website
1310		1138	Ohio	United States	2014-04-27	5141	Verified	Website
1311		1139	Washington	United States	2014-04-27	5330	Verified	Website
1312		1141	Ohio	United States	2014-04-27	4567	Verified	Website
1313		1142	Virginia	United States	2014-04-27	6835	Invalid	Website
1314		1143	New York	United States	2014-04-27	3612	Verified	Website
1315		1144	Michigan	United States	2014-04-26	8288	Verified	Website
1316		1145	Wisconsin	United States	2014-04-21	7814	Verified	Website
1317		1146	Washington	United States	2014-04-26	5861	Verified	Website
1318		1147	Washington	United States	2014-04-26	5861	Verified	Website
1319		1148	Connecticut	United States	2014-04-27	1615	Verified	Website
1320		1149	Kentucky	United States	2014-04-26	3376	Invalid	Website
1321		1150	Virginia	United States	2014-04-27	7867	Invalid	Website
1322		1151	Oregon	United States	2014-04-02	5124	Verified	Website
1323		1152	Oregon	United States	2014-04-27	2897	Verified	Website
1324		1153	Oregon	United States	2014-04-27	2897	Invalid	Website
1325		1154	Oregon	United States	2014-04-27	2897	Verified	Website
1326		1156	Oregon	United States	2014-04-28	2897	Invalid	Website
1327		1157	Oregon	United States	2014-04-28	2897	Invalid	Website
1328		1158	Alabama	United States	2014-04-22	2283	Verified	Website
1329		1159	Alabama	United States	2014-04-28	2283	Verified	Website
1330		1160	Alabama	United States	2014-04-28	2283	Verified	Website
1331		1161	Oregon	United States	2014-04-20	3992	Verified	Website
1332		1162	Illinois	United States	2014-04-25	685	Verified	Website
1333		1164	Washington	United States	2014-04-28	5861	Verified	Website
1334		1165	Oregon	United States	2014-04-28	4126	Invalid	Website
1335		1166	Washington	United States	2014-04-28	5861	Invalid	Website
1336		1167	Washington	United States	2014-04-28	5861	Verified	Website
1337		1168	British Columbia	Canada	2014-04-26	140	Verified	Website
1338		1170	Wisconsin	United States	2014-04-22	6080	Invalid	Website
1339		1171	Washington	United States	2014-04-28	5861	Verified	Website
1340		1172	Alberta	Canada	2013-07-31	1825	Verified	Website
1341		1173	Alberta	Canada	2013-07-31	1825	Verified	Website
1342		1174	Alberta	Canada	2007-07-26	1825	Verified	Website
1343		1175	Oregon	United States	2014-04-28	6213	Verified	Website
1344		1176	California	United States	2014-04-28	535	Verified	Website
1345		1177	California	United States	2014-04-28	535	Verified	Website
1346		1178	California	United States	2014-04-28	535	Verified	Website
1347		1179	California	United States	2014-04-28	535	Verified	Website
1348		1180	California	United States	2014-04-28	535	Verified	Website
1349		1181	New Jersey	United States	2014-04-28	4673	Verified	Website
1350		1183	Oregon	United States	2014-04-26	3992	Verified	Website
1351		1184	Oregon	United States	2014-04-29	731	Verified	Website
1352		1185	Oregon	United States	2014-04-29	4398	Verified	Website
1353		1186	Illinois	United States	2014-04-29	1434	Verified	Website
1354		1187	Washington	United States	2014-04-29	5861	Verified	Website
1355		1188	Oregon	United States	2014-04-29	3007	Verified	Website
1356		1189	Washington	United States	2014-04-29	5861	Verified	Website
1357		1190	Washington	United States	2014-04-29	5861	Verified	Website
1358		1191	Oregon	United States	2014-04-29	8511	Verified	Website
1359		1192	British Columbia	Canada	2014-04-29	2735	Verified	Website
1360		1193	British Columbia	Canada	2014-04-29	2735	Verified	Website
1361		1194	Texas	United States	2014-04-29	7943	Invalid	Website
1362		1195	Washington	United States	2014-04-29	5861	Verified	Website
1363		1196	Washington	United States	2014-04-29	1930	Invalid	Website
1364		1197	Alabama	United States	2014-04-13	4486	Invalid	Website
1365		1198	British Columbia	Canada	2014-04-30	3402	Verified	Website
1366		1199	Oregon	United States	2014-04-29	2050	Verified	Website
1367		1200	Oregon	United States	2014-04-29	4012	Verified	Website
1368		1201	Oregon	United States	2014-04-30	6939	Invalid	Website
1369		1202	Washington	United States	2014-04-29	1930	Verified	Website
1370		1203	British Columbia	Canada	2014-04-30	3402	Verified	Website
1371		1204	Washington	United States	2014-04-30	5861	Verified	Website
1372		1205	Oregon	United States	2014-04-25	4138	Verified	Website
1373		1206	Oregon	United States	2014-04-30	7859	Verified	Website
1374		1207	Oregon	United States	2013-10-26	1009	Verified	Website
1375		1208	Oregon	United States	2014-04-30	7932	Verified	Website
1376		1209	Massachusetts	United States	2014-04-22	1009	Verified	Website
1377		1210	Oregon	United States	2014-05-01	6709	Verified	Website
1378		1211	Oregon	United States	2014-04-30	8455	Invalid	Website
1379		1212	Oregon	United States	2014-04-30	234	Verified	Website
1380		1213	Oregon	United States	2014-05-01	3051	Verified	Website
1381		1214	Ontario	Canada	2013-08-04	5621	Verified	Website
1382		1215	British Columbia	Canada	2014-05-01	3402	Verified	Website
1383		1216	British Columbia	Canada	2013-06-28	4357	Verified	Website
1384		1217	British Columbia	Canada	2011-03-31	4357	Verified	Website
1385		1218	British Columbia	Canada	2012-06-02	4357	Verified	Website
1386		1220	Oregon	United States	2014-05-02	5750	Verified	Website
1387		1221	California	United States	2014-05-02	4836	Invalid	Website
1388		1222	Washington	United States	2014-05-02	5861	Verified	Website
1389		1223	Washington	United States	2014-05-02	5861	Verified	Website
1390		1224	Oregon	United States	2013-07-31	2448	Verified	Website
1391		1225	Alabama	United States	2014-05-01	7279	Verified	Website
1392		1227	Alabama	United States	2014-05-01	7279	Verified	Website
1393		1228	Florida	United States	2014-03-08	6435	Invalid	Website
1394		1229	Indiana	United States	2014-04-30	473	Invalid	Website
1395		1230	Idaho	United States	2014-05-02	5391	Verified	Website
1396		1231	Wisconsin	United States	2014-05-03	1993	Verified	Website
1397		1232	Wisconsin	United States	2014-05-03	1993	Invalid	Website
1398		1233	Wisconsin	United States	2014-05-03	1993	Invalid	Website
1399		1234	Virginia	United States	2014-05-03	6835	Invalid	Website
1400		1235	Oregon	United States	2014-05-02	6671	Verified	Website
1401		1236	California	United States	2014-05-03	4412	Invalid	Website
1402		1237	Arkansas	United States	2014-05-03	2633	Invalid	Website
1403		1238	Maryland	United States	2014-05-03	5617	Invalid	Website
1404		1239	Alabama	United States	2014-05-01	7279	Verified	Website
1405		1240	Idaho	United States	2014-05-03	7376	Verified	Website
1406		1241	Massachusetts	United States	2014-05-03	1813	Verified	Website
1407		1242	Oregon	United States	2014-04-24	4008	Verified	Website
1408		1243	Oregon	United States	2014-04-24	4008	Verified	Website
1409		1244	Oregon	United States	2014-04-25	4008	Verified	Website
1410		1246	Oregon	United States	2014-04-27	4008	Verified	Website
1411		1247	Oregon	United States	2014-04-28	4008	Verified	Website
1412		1248	Oregon	United States	2014-04-28	4008	Verified	Website
1413		1249	Oregon	United States	2014-04-29	4008	Verified	Website
1414		1250	Missouri	United States	2014-05-03	1933	Invalid	Website
1415		1251	Alabama	United States	2014-04-11	6238	Verified	Website
1416		1252	Oregon	United States	2014-05-03	2259	Verified	Website
1417		1253	Ohio	United States	2014-05-02	4891	Invalid	Website
1418		1254	California	United States	2014-05-03	3848	Invalid	Website
1419		1255	Pennsylvania	United States	2010-08-26	6529	Verified	Website
1420		1256	Alabama	United States	2014-04-14	6238	Invalid	Website
1421		1257	Alabama	United States	2014-04-19	6238	Verified	Website
1422		1258	Alabama	United States	2014-04-19	6238	Invalid	Website
1423		1259	Alabama	United States	2014-04-25	6238	Verified	Website
1424		1260	Alabama	United States	2014-04-20	6238	Invalid	Website
1425		1261	Alabama	United States	2014-04-18	6238	Verified	Website
1426		1262	Alabama	United States	2014-04-19	6238	Verified	Website
1427		1263	Alabama	United States	2014-04-11	6238	Verified	Website
1428		1264	Alabama	United States	2014-04-30	6238	Verified	Website
1429		1265	Alabama	United States	2014-04-27	6238	Invalid	Website
1430		1266	Alabama	United States	2014-04-28	430	Verified	Website
1431		1267	Alabama	United States	2014-04-30	430	Invalid	Website
1432		1268	Alabama	United States	2014-04-30	430	Invalid	Website
1433		1269	Indiana	United States	2014-05-04	5481	Invalid	Website
1434		1270	Alabama	United States	2014-04-27	6238	Invalid	Website
1435		1271	Alabama	United States	2014-04-26	6238	Invalid	Website
1436		1272	Alabama	United States	2014-04-25	6238	Invalid	Website
1437		1273	Alabama	United States	2014-04-23	6238	Invalid	Website
1438		1274	Alabama	United States	2014-04-23	6238	Invalid	Website
1439		1275	Alabama	United States	2014-04-23	6238	Verified	Website
1440		1276	Alabama	United States	2014-04-19	6238	Verified	Website
1441		1277	Alabama	United States	2014-04-22	6238	Invalid	Website
1442		1278	Alabama	United States	2014-04-22	6238	Invalid	Website
1443		1279	Alabama	United States	2014-04-22	6238	Invalid	Website
1444		1280	Alabama	United States	2014-04-22	6238	Invalid	Website
1445		1281	Alabama	United States	2014-04-17	6238	Invalid	Website
1446		1282	Mississippi	United States	2014-04-27	1394	Invalid	Website
1447		1283	Alabama	United States	2014-04-26	1394	Invalid	Website
1448		1284	Alabama	United States	2014-04-28	1394	Invalid	Website
1449		1285	Alabama	United States	2014-04-27	1394	Invalid	Website
1450		1286	Alabama	United States	2014-04-19	1394	Invalid	Website
1451		1287	Alabama	United States	2014-04-30	1394	Verified	Website
1452		1289	Alabama	United States	2014-04-19	1394	Verified	Website
1453		1290	Alabama	United States	2014-05-01	1394	Verified	Website
1454		1291	New York	United States	2014-05-04	3669	Verified	Website
1455		1292	British Columbia	Canada	2014-05-04	6962	Verified	Website
1456		1293	Alabama	United States	2014-05-02	7620	Verified	Website
1457		1294	Alabama	United States	2014-05-02	7620	Verified	Website
1458		1295	Alabama	United States	2014-05-02	7620	Verified	Website
1459		1296	Alabama	United States	2014-05-03	7620	Verified	Website
1460		1297	Alabama	United States	2014-05-03	7620	Verified	Website
1461		1298	Alabama	United States	2014-05-03	7620	Verified	Website
1462		1299	Alabama	United States	2014-05-03	7620	Verified	Website
1463		1300	Alabama	United States	2014-05-03	7620	Verified	Website
1464		1301	Alabama	United States	2014-05-03	7620	Verified	Website
1465		1302	Alabama	United States	2014-05-03	7620	Verified	Website
1466		1303	Illinois	United States	2014-04-21	5880	Invalid	Website
1467		1304	Kentucky	United States	2014-05-04	6308	Invalid	Website
1468		1305	Alabama	United States	2014-05-02	7620	Verified	Website
1469		1306	California	United States	2014-05-04	4016	Verified	Website
1470		1307	Alabama	United States	2014-04-27	7620	Invalid	Website
1471		1308	Alabama	United States	2014-03-11	977	Verified	Website
1472		1309	Alabama	United States	2014-04-18	977	Invalid	Website
1473		1310	Alabama	United States	2014-04-24	977	Invalid	Website
1474		1311	Alabama	United States	2014-04-24	977	Invalid	Website
1475		1312	Arkansas	United States	2014-04-27	4527	Invalid	Website
1476		1313	Montana	United States	2014-05-04	8266	Invalid	Website
1477		1314	Oklahoma	United States	2014-05-03	5863	Verified	Website
1478		1315	Virginia	United States	2014-05-04	6835	Invalid	Website
1479		1316	Oregon	United States	2014-05-02	2354	Verified	Website
1480		1317	Oregon	United States	2014-05-01	4008	Verified	Website
1481		1318	California	United States	2014-05-03	6927	Verified	Website
1482		1319	Montana	United States	2014-04-29	6699	Verified	Website
1483		1320	Washington	United States	2014-04-08	6763	Verified	Website
1484		1321	Oregon	United States	2014-04-25	7350	Invalid	Website
1485		1322	Ontario	Canada	2014-05-05	1323	Verified	Website
1486		1323	Nebraska	United States	2014-05-05	8242	Verified	Website
1487		1324	Illinois	United States	2014-05-03	399	Verified	Website
1488		1325	Alabama	United States	2013-05-01	2575	Invalid	Website
1489		1326	Alabama	United States	2013-05-02	2575	Invalid	Website
1490		1327	Alabama	United States	2014-04-18	2575	Verified	Website
1491		1328	British Columbia	Canada	2011-07-05	4357	Verified	Website
1492		1329	Alabama	United States	2014-04-18	2575	Invalid	Website
1493		1330	Alabama	United States	2014-04-18	2575	Invalid	Website
1494		1331	Alabama	United States	2014-04-19	2575	Invalid	Website
1495		1332	Alabama	United States	2014-04-19	2575	Invalid	Website
1496		1334	Alabama	United States	2014-04-19	2575	Verified	Website
1497		1335	Alabama	United States	2014-04-20	2575	Verified	Website
1498		1336	Alabama	United States	2014-04-20	2575	Invalid	Website
1499		1337	British Columbia	Canada	2011-07-05	4357	Verified	Website
1500		1338	Alabama	United States	2014-05-04	2575	Invalid	Website
1501		1339	British Columbia	Canada	2011-07-22	4357	Verified	Website
1502		1340	Massachusetts	United States	2014-05-05	6288	Verified	Website
1503		1342	Maryland	United States	2014-05-04	3028	Verified	Website
1504		1343	New York	United States	2014-04-19	494	Verified	Website
1505		1344	New York	United States	2014-05-05	494	Verified	Website
1506		1345	New York	United States	2014-05-05	494	Verified	Website
1507		1346	Texas	United States	2014-05-05	7891	Verified	Website
1508		1347	New York	United States	2014-05-05	3669	Verified	Website
1509		1348	Texas	United States	2014-05-05	7891	Verified	Website
1510		1349	Texas	United States	2014-05-05	7891	Verified	Website
1511		1353	British Columbia	Canada	2014-05-05	3402	Verified	Website
1512		1354	Alabama	United States	2014-05-03	6191	Verified	Website
1513		1355	Mississippi	United States	2014-04-26	6191	Invalid	Website
1514		1356	Mississippi	United States	2014-04-26	6191	Verified	Website
1515		1357	Mississippi	United States	2014-04-26	6191	Verified	Website
1516		1358	Mississippi	United States	2014-04-26	6191	Verified	Website
1517		1359	Mississippi	United States	2014-04-26	6191	Verified	Website
1518		1360	Mississippi	United States	2014-04-26	6191	Verified	Website
1519		1361	Mississippi	United States	2014-04-26	6191	Invalid	Website
1520		1362	Alabama	United States	2014-04-27	6191	Verified	Website
1521		1363	Alabama	United States	2014-04-19	8020	Verified	Website
1522		1364	Alabama	United States	2014-04-19	8020	Invalid	Website
1523		1365	Alabama	United States	2014-04-19	8020	Invalid	Website
1524		1366	Alabama	United States	2014-04-26	8020	Invalid	Website
1525		1367	Alabama	United States	2014-04-26	8020	Verified	Website
1526		1368	Alabama	United States	2014-05-01	8020	Invalid	Website
1527		1369	Alabama	United States	2014-05-01	8020	Invalid	Website
1528		1370	Alabama	United States	2014-05-01	8020	Verified	Website
1529		1371	Oregon	United States	2014-04-27	1788	Verified	Website
1530		1372	New Hampshire	United States	2014-05-06	3704	Verified	Website
1531		1373	Washington	United States	2014-05-05	5861	Verified	Website
1532		1374	Iowa	United States	2014-05-06	6901	Verified	Website
1533		1376	Washington	United States	2014-05-06	4038	Invalid	Website
1534		1377	Idaho	United States	2014-05-06	7376	Verified	Website
1535		1378	Oregon	United States	2014-05-05	6877	Verified	Website
1536		1379	Oregon	United States	2014-05-05	6877	Verified	Website
1537		1380	Washington	United States	2014-05-06	4038	Verified	Website
1538		1381	Oregon	United States	2014-05-07	3234	Verified	Website
1539		1382	New Jersey	United States	2014-05-07	3166	Verified	Website
1540		1383	Oregon	United States	2014-05-02	6877	Verified	Website
1541		1384	Oregon	United States	2014-05-02	6877	Verified	Website
1542		1385	South Carolina	United States	2014-05-07	4793	Invalid	Website
1543		1386	New York	United States	2014-05-07	2220	Verified	Website
1544		1387	Wisconsin	United States	2014-05-07	1993	Verified	Website
1545		1388	Oregon	United States	2014-05-07	7721	Invalid	Website
1546		1389	Massachusetts	United States	2014-05-07	678	Verified	Website
1547		1390	Oregon	United States	2014-05-01	4853	Invalid	Website
1548		1391	British Columbia	Canada	2014-05-07	3240	Verified	Website
1549		1392	British Columbia	Canada	2014-05-07	3240	Verified	Website
1550		1393	British Columbia	Canada	2014-05-07	3240	Verified	Website
1551		1394	Oregon	United States	2014-05-07	7804	Verified	Website
1552		1395	Oregon	United States	2014-05-07	6283	Verified	Website
1553		1396	British Columbia	Canada	2014-05-07	3240	Verified	Website
1554		1397	British Columbia	Canada	2014-04-18	3240	Verified	Website
1555		1398	Oregon	United States	2014-05-01	4850	Invalid	Website
1556		1401	Washington	United States	2014-05-08	5993	Verified	Website
1557		1402	Washington	United States	2014-05-08	5993	Verified	Website
1558		1403	Ohio	United States	2014-05-08	5141	Verified	Website
1559		1404	Idaho	United States	2014-05-08	6778	Verified	Website
1560		1405	Oregon	United States	2014-05-08	4734	Invalid	Website
1561		1406	Oregon	United States	2014-05-01	4850	Verified	Website
1562		1407	Oklahoma	United States	2014-05-07	6000	Verified	Website
1563		1408	Idaho	United States	2014-05-08	6778	Verified	Website
1564		1409	Oklahoma	United States	2014-05-07	6000	Verified	Website
1565		1410	South Carolina	United States	2014-05-07	2806	Invalid	Website
1566		1411	Nebraska	United States	2014-05-07	7373	Verified	Website
1567		1413	Washington	United States	2014-05-08	5192	Verified	Website
1568		1414	Oregon	United States	2014-05-07	4008	Verified	Website
1569		1415	Alberta	Canada	2014-05-08	2856	Verified	Website
1570		1416	Oregon	United States	2014-05-07	4008	Verified	Website
1571		1417	Ohio	United States	2014-05-08	5998	Invalid	Website
1572		1418	Oklahoma	United States	2014-05-08	5863	Verified	Website
1573		1419	Oregon	United States	2014-04-26	5648	Invalid	Website
1574		1420	Oregon	United States	2014-05-07	5190	Invalid	Website
1575		1421	Oregon	United States	2014-05-07	5190	Verified	Website
1576		1422	Oregon	United States	2014-05-07	6952	Verified	Website
1577		1423	Oregon	United States	2014-05-07	6952	Verified	Website
1578		1424	Michigan	United States	2014-05-05	5565	Verified	Website
1579		1425	Alberta	Canada	2014-05-09	2856	Verified	Website
1580		1426	New Hampshire	United States	2014-05-09	2131	Invalid	Website
1581		1427	California	United States	2014-05-09	4870	Verified	Website
1582		1428	Tennessee	United States	2014-05-09	5220	Verified	Website
1583		1429	Pennsylvania	United States	2014-05-09	5352	Verified	Website
1584		1430	Kansas	United States	2014-05-07	1962	Verified	Website
1585		1431	California	United States	2014-05-09	535	Verified	Website
1586		1432	California	United States	2014-05-09	535	Verified	Website
1587		1433	Pennsylvania	United States	2014-05-09	7569	Verified	Website
1588		1434	Michigan	United States	2014-05-09	1165	Verified	Website
1589		1435	Ontario	Canada	2014-05-10	2771	Invalid	Website
1590		1436	Idaho	United States	2014-05-10	3703	Verified	Website
1591		1437	Washington	United States	2014-05-07	3987	Verified	Website
1592		1438	Wisconsin	United States	2014-05-10	7152	Verified	Website
1593		1439	Oregon	United States	2014-05-10	6903	Verified	Website
1594		1440	New Hampshire	United States	2014-05-10	4189	Verified	Website
1595		1441	Washington	United States	2014-05-10	2212	Verified	Website
1596		1442	California	United States	2014-04-20	1732	Verified	Website
1597		1443	California	United States	2014-05-10	1557	Invalid	Website
1598		1444	California	United States	2014-04-20	1732	Verified	Website
1599		1445	California	United States	2014-04-20	1732	Verified	Website
1600		1446	British Columbia	Canada	2014-05-10	3240	Verified	Website
1601		1447	British Columbia	Canada	2014-05-10	3240	Verified	Website
1602		1448	Minnesota	United States	2014-05-10	7498	Verified	Website
1603		1449	Oregon	United States	2014-05-06	7927	Verified	Website
1604		1450	Massachusetts	United States	2014-05-05	5333	Verified	Website
1605		1451	Washington	United States	2014-05-10	1930	Verified	Website
1606		1452	Washington	United States	2014-05-10	1930	Verified	Website
1607		1453	Washington	United States	2014-05-10	722	Tentative	Website
1608		1454	Washington	United States	2014-05-10	722	Verified	Website
1609		1455	Washington	United States	2014-05-10	722	Verified	Website
1610		1456	Washington	United States	2014-05-10	1930	Tentative	Website
1611		1457	Washington	United States	2014-05-10	722	Verified	Website
1612		1458	Washington	United States	2014-05-10	722	Tentative	Website
1613		1459	Alaska	United States	2014-05-10	5815	Verified	Website
1614		1460	Manitoba	Canada	2013-05-23	2958	Invalid	Website
1615		1461	Oklahoma	United States	2014-05-09	7163	Verified	Website
1616		1462	Oklahoma	United States	2014-05-09	7163	Verified	Website
1617		1463	Oklahoma	United States	2014-05-09	7163	Verified	Website
1618		1464	Oklahoma	United States	2014-05-09	7163	Verified	Website
1619		1465	Oklahoma	United States	2014-05-09	7163	Verified	Website
1620		1467	Oklahoma	United States	2014-05-09	7163	Verified	Website
1621		1468	Oklahoma	United States	2014-05-09	7163	Verified	Website
1622		1469	Oklahoma	United States	2014-05-09	7163	Verified	Website
1623		1471	Ontario	Canada	2014-05-11	7626	Verified	Website
1624		1472	Oregon	United States	2010-04-25	1152	Verified	Website
1625		1473	Oregon	United States	2014-05-11	3737	Verified	Website
1626		1474	Washington	United States	2014-05-11	3987	Verified	Website
1627		1475	Washington	United States	2014-05-11	3987	Verified	Website
1628		1476	New Jersey	United States	2014-05-11	3272	Invalid	Website
1629		1477	Ontario	Canada	2014-05-11	4845	Invalid	Website
1630		1478	Ontario	Canada	2014-05-11	4845	Invalid	Website
1631		1479	New York	United States	2014-05-11	4664	Verified	Website
1632		1480	Colorado	United States	2014-05-11	661	Verified	Website
1633		1481	Minnesota	United States	2014-05-11	7657	Invalid	Website
1634		1482	Massachusetts	United States	2014-05-11	306	Invalid	Website
1635		1483	Michigan	United States	2014-05-11	5480	Invalid	Website
1636		1484	Nova Scotia	Canada	2014-05-11	1261	Verified	Website
1637		1485	Nova Scotia	Canada	2014-05-11	1261	Verified	Website
1638		1486	Arkansas	United States	2014-05-11	1405	Verified	Website
1639		1487	Nova Scotia	Canada	2014-05-04	1261	Verified	Website
1640		1488	Massachusetts	United States	2014-05-11	306	Invalid	Website
1641		1489	California	United States	2014-05-11	1732	Verified	Website
1642		1490	Idaho	United States	2014-05-11	3241	Verified	Website
1643		1491	Washington	United States	2014-05-11	25	Verified	Website
1644		1492	Ontario	Canada	2014-05-11	1887	Verified	Website
1645		1493	Washington	United States	2014-05-11	3987	Verified	Website
1646		1494	Washington	United States	2014-05-11	6855	Verified	Website
1647		1495	Wisconsin	United States	2014-05-10	6653	Verified	Website
1648		1496	Washington	United States	2014-05-11	3987	Verified	Website
1649		1497	Washington	United States	2014-05-11	3987	Verified	Website
1650		1498	Washington	United States	2014-05-11	3987	Verified	Website
1651		1499	Washington	United States	2014-05-11	3987	Verified	Website
1652		1500	Washington	United States	2014-05-06	5861	Verified	Website
1653		1501	Washington	United States	2014-05-06	5861	Verified	Website
1654		1503	Washington	United States	2014-05-07	5861	Verified	Website
1655		1504	Washington	United States	2014-05-07	5861	Verified	Website
1656		1505	Washington	United States	2014-05-09	5861	Verified	Website
1657		1506	Washington	United States	2014-05-11	5861	Verified	Website
1658		1507	Virginia	United States	2014-05-12	6674	Invalid	Website
1659		1508	Texas	United States	2014-05-10	1161	Verified	Website
1660		1509	Texas	United States	2014-05-10	1161	Verified	Website
1661		1510	Washington	United States	2014-05-11	4316	Verified	Website
1662		1511	Michigan	United States	2014-05-10	1165	Verified	Website
1663		1512	Washington	United States	2014-05-11	4316	Verified	Website
1664		1513	Michigan	United States	2014-05-10	1165	Verified	Website
1665		1514	Oregon	United States	2014-05-11	7342	Verified	Website
1666		1515	Oregon	United States	2014-05-12	4754	Verified	Website
1667		1516	Oregon	United States	2014-05-12	4249	Verified	Website
1668		1517	California	United States	2014-01-14	2728	Verified	Website
1669		1518	Oregon	United States	2014-05-11	7342	Verified	Website
1670		1519	California	United States	2014-05-04	7421	Verified	Website
1671		1520	Oregon	United States	2014-05-11	4833	Verified	Website
1672		1521	Tennessee	United States	2013-08-21	3692	Verified	Website
1673		1522	New Jersey	United States	2014-05-12	4067	Invalid	Website
1674		1523	Ontario	Canada	2014-05-12	3218	Verified	Website
1675		1524	Ontario	Canada	2014-05-12	4212	Verified	Website
1676		1525	New York	United States	2014-05-12	4664	Verified	Website
1677		1526	Vermont	United States	2014-05-12	7207	Verified	Website
1678		1527	Oregon	United States	2014-05-12	1127	Verified	Website
1679		1528	Idaho	United States	2014-05-12	7376	Verified	Website
1680		1529	Idaho	United States	2014-05-12	7376	Verified	Website
1681		1530	Oregon	United States	2014-05-10	5190	Invalid	Website
1682		1531	Indiana	United States	2014-05-12	4385	Verified	Website
1683		1532	Minnesota	United States	2014-05-11	7300	Verified	Website
1684		1533	Nebraska	United States	2014-05-11	5244	Verified	Website
1685		1534	Alabama	United States	2014-05-13	6752	Invalid	Website
1686		1535	Alberta	Canada	2014-05-12	2856	Invalid	Website
1687		1536	Washington	United States	2014-05-13	4099	Verified	Website
1688		1537	Washington	United States	2014-05-13	4355	Verified	Website
1689		1538	Washington	United States	2014-05-13	4355	Verified	Website
1690		1539	Washington	United States	2014-05-10	4355	Verified	Website
1691		1540	Oregon	United States	2014-05-13	8488	Verified	Website
1692		1541	Arizona	United States	2014-04-21	374	Invalid	Website
1693		1542	Oregon	United States	2014-05-13	1038	Verified	Website
1694		1543	Oregon	United States	2014-05-13	1870	Verified	Website
1695		1544	Wisconsin	United States	2014-05-10	2894	Verified	Website
1696		1545	Oregon	United States	2014-05-13	1016	Verified	Website
1697		1546	Maryland	United States	2014-05-10	439	Verified	Website
1698		1547	Maryland	United States	2014-05-10	439	Verified	Website
1699		1548	Minnesota	United States	2013-08-05	7498	Verified	Website
1700		1549	Alberta	Canada	2014-05-13	2136	Verified	Website
1701		1550	Oregon	United States	2014-05-13	5784	Verified	Website
1702		1551	Oregon	United States	2014-05-13	5784	Verified	Website
1703		1552	Oregon	United States	2014-05-13	5784	Verified	Website
1704		1553	Virginia	United States	2014-05-13	2441	Verified	Website
1705		1554	Massachusetts	United States	2014-05-10	2618	Verified	Website
1706		1555	Ontario	Canada	2014-05-14	7848	Verified	Website
1707		1556	Michigan	United States	2014-05-13	918	Verified	Website
1708		1557	New Jersey	United States	2014-05-11	4606	Verified	Website
1709		1558	Oregon	United States	2014-05-14	5171	Verified	Website
1710		1559	California	United States	2014-05-14	8474	Invalid	Website
1711		1560	Texas	United States	2014-05-13	1161	Verified	Website
1712		1561	Alberta	Canada	2014-05-14	2136	Verified	Website
1713		1562	Alberta	Canada	2014-05-14	2136	Invalid	Website
1714		1563	Washington	United States	2014-05-12	5861	Verified	Website
1715		1564	Washington	United States	2014-05-13	5861	Invalid	Website
1716		1565	Washington	United States	2014-05-14	5861	Verified	Website
1717		1566	Pennsylvania	United States	2014-05-10	472	Verified	Website
1718		1567	California	United States	2014-04-20	6679	Invalid	Website
1719		1568	Oregon	United States	2014-05-14	3340	Verified	Website
1720		1569	Idaho	United States	2014-05-13	7376	Verified	Website
1721		1570	Idaho	United States	2014-05-14	6778	Verified	Website
1722		1571	Idaho	United States	2014-05-14	6778	Verified	Website
1723		1572	Idaho	United States	2014-05-14	6778	Verified	Website
1724		1573	Washington	United States	2014-05-14	4207	Verified	Website
1725		1574	Michigan	United States	2014-05-04	1902	Verified	Website
1726		1575	Idaho	United States	2014-05-15	8317	Verified	Website
1727		1576	New Jersey	United States	2014-05-11	3911	Invalid	Website
1728		1577	New Hampshire	United States	2014-05-15	3237	Verified	Website
1729		1578	Idaho	United States	2014-05-15	8317	Verified	Website
1730		1579	Washington	United States	2014-05-15	5861	Verified	Website
1731		1580	Washington	United States	2014-05-15	5861	Verified	Website
1732		1581	Washington	United States	2014-05-15	5861	Verified	Website
1733		1582	Washington	United States	2014-05-15	5861	Verified	Website
1734		1583	Washington	United States	2014-05-15	5861	Verified	Website
1735		1584	Washington	United States	2014-05-15	5861	Verified	Website
1736		1585	Washington	United States	2014-05-15	5861	Verified	Website
1737		1586	Minnesota	United States	2014-05-14	572	Verified	Website
1738		1587	British Columbia	Canada	2011-08-17	4357	Verified	Website
1739		1588	British Columbia	Canada	2011-08-23	4357	Verified	Website
1740		1589	British Columbia	Canada	2011-08-29	4357	Invalid	Website
1741		1590	Alberta	Canada	2014-05-15	8414	Verified	Website
1742		1591	Alberta	Canada	2014-05-14	8414	Verified	Website
1743		1592	Alberta	Canada	2014-05-15	8414	Verified	Website
1744		1593	California	United States	2014-05-15	7004	Verified	Website
1745		1594	Oregon	United States	2014-05-14	1127	Verified	Website
1746		1595	Michigan	United States	2014-05-13	5565	Verified	Website
1747		1596	British Columbia	Canada	2013-08-09	4357	Verified	Website
1748		1597	British Columbia	Canada	2013-08-09	4357	Verified	Website
1749		1598	British Columbia	Canada	2014-03-24	4357	Verified	Website
1750		1599	British Columbia	Canada	2014-03-24	4357	Verified	Website
1751		1600	British Columbia	Canada	2014-03-24	4357	Verified	Website
1752		1601	Oregon	United States	2014-05-16	7167	Verified	Website
1753		1602	Oregon	United States	2014-05-14	1678	Verified	Website
1754		1603	Oregon	United States	2014-05-14	858	Verified	Website
1755		1604	Washington	United States	2014-05-09	3011	Verified	Website
1756		1605	Pennsylvania	United States	2014-05-16	5352	Verified	Website
1757		1606	Washington	United States	2014-05-16	3987	Verified	Website
1758		1607	Washington	United States	2014-05-16	3987	Verified	Website
1759		1608	Washington	United States	2014-05-16	3987	Verified	Website
1760		1609	Washington	United States	2014-05-16	25	Verified	Website
1761		1610	Oregon	United States	2014-05-14	6729	Verified	Website
1762		1611	Nevada	United States	2014-05-14	5647	Verified	Website
1763		1612	British Columbia	Canada	2014-04-04	4357	Verified	Website
1764		1613	Texas	United States	2012-08-09	3477	Verified	Website
1765		1614	New Jersey	United States	2014-05-17	4067	Invalid	Website
1766		1615	Michigan	United States	2014-05-15	5095	Verified	Website
1767		1617	British Columbia	Canada	2014-04-28	4357	Verified	Website
1768		1619	Oregon	United States	2014-05-10	4059	Verified	Website
1769		1620	Oregon	United States	2014-05-10	3992	Verified	Website
1770		1621	Maine	United States	2014-05-10	1060	Verified	Website
1771		1622	Alberta	Canada	2014-05-14	8224	Verified	Website
1772		1623	Texas	United States	2014-05-17	5079	Invalid	Website
1773		1624	New Brunswick	Canada	2014-05-17	7315	Invalid	Website
1774		1625	California	United States	2014-05-17	8105	Verified	Website
1775		1626	Kentucky	United States	2014-05-17	507	Verified	Website
1776		1627	Texas	United States	2014-05-17	5079	Invalid	Website
1777		1628	Texas	United States	2014-05-17	5079	Invalid	Website
1778		1630	British Columbia	Canada	2011-08-29	4357	Verified	Website
1779		1631	Ontario	Canada	2014-05-17	5396	Verified	Website
1780		1632	Washington	United States	2014-05-17	6260	Verified	Website
1781		1633	Ontario	Canada	2014-05-17	5396	Verified	Website
1782		1634	Oregon	United States	2014-05-17	6833	Verified	Website
1783		1635	Ontario	Canada	2014-05-17	4212	Verified	Website
1784		1636	Michigan	United States	2014-05-17	8288	Verified	Website
1785		1638	Washington	United States	2014-05-17	3046	Verified	Website
1786		1639	Washington	United States	2014-05-17	3046	Verified	Website
1787		1640	Washington	United States	2014-05-17	6656	Verified	Website
1788		1641	Massachusetts	United States	2013-10-01	4905	Verified	Website
1789		1642	Washington	United States	2014-05-11	3046	Verified	Website
1790		1643	Nebraska	United States	2014-05-17	5126	Verified	Website
1791		1644	Massachusetts	United States	2014-05-18	1492	Verified	Website
1792		1645	Idaho	United States	2014-05-17	8317	Verified	Website
1793		1646	Alberta	Canada	2014-05-18	5497	Tentative	Website
1794		1647	British Columbia	Canada	2012-05-21	4357	Verified	Website
1795		1649	British Columbia	Canada	2013-06-01	4357	Verified	Website
1796		1650	British Columbia	Canada	2014-04-09	4357	Verified	Website
1797		1651	British Columbia	Canada	2014-04-09	4357	Verified	Website
1798		1653	Wisconsin	United States	2014-05-18	5541	Verified	Website
1799		1654	Indiana	United States	2014-05-13	1205	Verified	Website
1800		1656	Ontario	Canada	2014-05-18	5396	Verified	Website
1801		1657	Texas	United States	2014-04-27	3823	Verified	Website
1802		1658	Texas	United States	2014-04-27	3823	Verified	Website
1803		1660	Texas	United States	2014-04-27	3823	Verified	Website
1804		1665	Texas	United States	2014-04-27	3823	Verified	Website
1805		1666	Texas	United States	2014-05-02	3823	Verified	Website
1806		1667	Texas	United States	2014-05-02	3823	Verified	Website
1807		1668	Texas	United States	2014-05-02	3823	Verified	Website
1808		1669	Texas	United States	2014-05-02	3823	Verified	Website
1809		1671	Ontario	Canada	2014-05-18	4196	Verified	Website
1810		1672	Minnesota	United States	2014-05-18	3759	Verified	Website
1811		1673	Washington	United States	2014-05-18	7433	Verified	Website
1812		1674	Nova Scotia	Canada	2014-05-15	1956	Verified	Website
1813		1675	Oregon	United States	2014-05-14	4869	Verified	Website
1814		1678	Ontario	Canada	2014-05-18	500	Verified	Website
1815		1679	Idaho	United States	2014-05-18	1758	Verified	Website
1816		1680	Colorado	United States	2014-05-17	4659	Verified	Website
1817		1681	Washington	United States	2014-05-19	113	Verified	Website
1818		1682	Ontario	Canada	2014-05-19	66	Invalid	Website
1819		1683	Minnesota	United States	2014-05-18	4107	Verified	Website
1820		1684	British Columbia	Canada	2014-05-19	4357	Verified	Website
1821		1685	Oregon	United States	2014-05-19	6942	Invalid	Website
1822		1686	Virginia	United States	2014-05-18	239	Verified	Website
1823		1687	Oregon	United States	2014-05-19	6283	Verified	Website
1824		1688	Washington	United States	2014-05-17	7186	Verified	Website
1825		1689	Washington	United States	2014-05-14	7186	Verified	Website
1826		1690	Washington	United States	2014-05-10	7186	Verified	Website
1827		1691	Alabama	United States	2014-05-19	7111	Verified	Website
1828		1692	Oregon	United States	2014-05-19	7191	Verified	Website
1829		1693	Oregon	United States	2014-05-11	7191	Verified	Website
1830		1694	British Columbia	Canada	2014-04-29	4357	Verified	Website
1831		1695	British Columbia	Canada	2014-05-10	4357	Verified	Website
1832		1696	British Columbia	Canada	2014-05-10	4357	Verified	Website
1833		1697	California	United States	2014-05-20	7417	Invalid	Website
1834		1698	New Jersey	United States	2014-05-15	4573	Invalid	Website
1835		1699	Michigan	United States	2014-05-20	5083	Pending	Website
1836		1700	Virginia	United States	2012-06-09	239	Verified	Website
1837		1701	Ontario	Canada	2014-05-20	5336	Invalid	Website
1838		1702	Minnesota	United States	2014-05-20	4107	Verified	Website
1839		1703	Ontario	Canada	2014-05-13	5396	Verified	Website
1840		1704	New York	United States	2014-05-19	7196	Invalid	Website
1841		1705	Minnesota	United States	2014-05-20	3759	Verified	Website
1842		1706	Maine	United States	2014-05-20	5029	Invalid	Website
1843		1707	Maine	United States	2014-05-20	5029	Verified	Website
1844		1708	Wisconsin	United States	2014-05-11	6369	Verified	Website
1845		1709	Wisconsin	United States	2014-05-20	6369	Verified	Website
1846		1710	Washington	United States	2014-05-17	6260	Verified	Website
1847		1711	Colorado	United States	2014-05-20	3882	Verified	Website
1848		1712	Minnesota	United States	2014-05-20	3759	Verified	Website
1849		1713	Virginia	United States	2014-05-18	4971	Verified	Website
1850		1714	Wisconsin	United States	2014-05-20	1993	Verified	Website
1851		1715	California	United States	2014-05-20	4870	Verified	Website
1852		1716	Wyoming	United States	2014-05-20	2557	Invalid	Website
1853		1717	Wyoming	United States	2014-05-20	2557	Verified	Website
1854		1718	Ontario	Canada	2014-05-20	7801	Verified	Website
1855		1719	Oregon	United States	2014-05-20	700	Verified	Website
1856		1720	Illinois	United States	2014-05-11	5422	Verified	Website
1857		1721	Illinois	United States	2014-05-12	5422	Invalid	Website
1858		1722	British Columbia	Canada	2014-05-18	3267	Verified	Website
1859		1723	British Columbia	Canada	2014-05-16	3267	Verified	Website
1860		1724	Alabama	United States	2014-05-19	591	Verified	Website
1861		1725	Pennsylvania	United States	2014-05-21	1853	Verified	Website
1862		1726	California	United States	2014-05-08	1708	Verified	Website
1863		1727	Oregon	United States	2014-05-12	5886	Verified	Website
1864		1728	Washington	United States	2014-05-20	1697	Invalid	Website
1865		1729	Illinois	United States	2014-05-21	1233	Invalid	Website
1866		1730	Quebec	Canada	2014-05-21	1268	Verified	Website
1867		1732	Maine	United States	2014-05-21	2476	Verified	Website
1868		1733	Maine	United States	2014-05-21	2476	Verified	Website
1869		1734	Ontario	Canada	2014-05-21	211	Verified	Website
1870		1735	Michigan	United States	2014-05-17	918	Verified	Website
1871		1736	Nova Scotia	Canada	2014-05-21	7611	Verified	Website
1872		1737	Wyoming	United States	2014-05-21	7574	Verified	Website
1873		1738	Alberta	Canada	2014-05-21	2856	Verified	Website
1874		1739	Ontario	Canada	2014-05-20	4212	Verified	Website
1875		1740	Ontario	Canada	2014-05-20	4212	Verified	Website
1876		1741	Ohio	United States	2014-05-20	4891	Invalid	Website
1877		1742	Ontario	Canada	2014-05-19	1194	Verified	Website
1878		1744	Montana	United States	2014-05-19	1263	Verified	Website
1879		1745	Montana	United States	2013-09-19	1263	Verified	Website
1880		1746	Alberta	Canada	2014-05-21	8414	Verified	Website
1881		1747	Alberta	Canada	2014-05-21	8414	Verified	Website
1882		1748	Michigan	United States	2014-05-20	918	Verified	Website
1883		1749	Wyoming	United States	2014-05-15	4777	Verified	Website
1884		1751	Ontario	Canada	2014-05-21	6591	Verified	Website
1885		1752	Massachusetts	United States	2014-05-19	1492	Verified	Website
1886		1754	Oregon	United States	2014-05-22	3210	Invalid	Website
1887		1755	Virginia	United States	2014-05-22	239	Verified	Website
1888		1756	Oregon	United States	2014-05-10	4008	Verified	Website
1889		1757	Alberta	Canada	2014-05-22	8414	Verified	Website
1890		1758	Alberta	Canada	2014-05-22	8414	Verified	Website
1891		1759	Alberta	Canada	2014-05-22	8414	Verified	Website
1892		1760	Oregon	United States	2014-05-11	4008	Verified	Website
1893		1761	Oregon	United States	2014-05-12	5886	Verified	Website
1894		1762	Alberta	Canada	2014-05-22	8414	Verified	Website
1895		1763	Oregon	United States	2014-05-12	5886	Verified	Website
1896		1764	Alberta	Canada	2014-05-22	8414	Verified	Website
1897		1765	Oregon	United States	2014-05-12	4008	Verified	Website
1898		1766	Oregon	United States	2014-05-13	4008	Verified	Website
1899		1767	Oregon	United States	2014-05-22	4008	Verified	Website
1900		1768	Alberta	Canada	2014-05-22	2136	Verified	Website
1901		1769	Alberta	Canada	2014-05-22	2136	Verified	Website
1902		1770	Wyoming	United States	2014-05-22	7574	Verified	Website
1903		1771	Wyoming	United States	2014-05-22	7574	Verified	Website
1904		1772	Washington	United States	2014-05-15	5861	Verified	Website
1905		1773	Washington	United States	2014-05-15	5861	Verified	Website
1906		1774	Washington	United States	2014-05-15	5861	Verified	Website
1907		1775	Washington	United States	2014-05-15	5861	Verified	Website
1908		1776	Washington	United States	2014-05-16	5861	Verified	Website
1909		1777	Washington	United States	2014-05-16	5861	Verified	Website
1910		1778	Washington	United States	2014-05-16	5861	Verified	Website
1911		1779	Michigan	United States	2014-05-22	7537	Verified	Website
1912		1780	Washington	United States	2014-05-20	5861	Verified	Website
1913		1781	Washington	United States	2014-05-20	5861	Verified	Website
1914		1782	Washington	United States	2014-05-20	5861	Verified	Website
1915		1783	Washington	United States	2014-05-20	5861	Verified	Website
1916		1785	Washington	United States	2014-05-20	5861	Verified	Website
1917		1786	Washington	United States	2014-05-21	5861	Invalid	Website
1918		1787	Washington	United States	2014-05-21	5861	Verified	Website
1919		1788	Washington	United States	2014-05-21	5861	Verified	Website
1920		1789	Washington	United States	2014-05-21	5861	Verified	Website
1921		1790	Washington	United States	2014-05-21	5861	Verified	Website
1922		1791	Washington	United States	2014-05-21	5861	Verified	Website
1923		1792	Washington	United States	2014-05-21	5861	Tentative	Website
1924		1793	Washington	United States	2014-05-21	5861	Verified	Website
1925		1794	Washington	United States	2014-05-22	5861	Verified	Website
1926		1795	Wyoming	United States	2014-04-21	3149	Verified	Website
1927		1796	Minnesota	United States	2014-05-17	3098	Verified	Website
1928		1797	Oregon	United States	2014-05-22	8236	Verified	Website
1929		1798	Wyoming	United States	2014-05-23	7574	Verified	Website
1930		1801	Virginia	United States	2014-05-23	2441	Verified	Website
1931		1802	Idaho	United States	2014-05-22	8317	Verified	Website
1932		1804	Washington	United States	2014-05-23	5861	Verified	Website
1933		1806	Washington	United States	2014-05-23	5861	Verified	Website
1934		1807	California	United States	2014-05-23	7500	Verified	Website
1935		1808	Ontario	Canada	2014-05-21	1257	Verified	Website
1936		1809	British Columbia	Canada	2014-05-23	2774	Verified	Website
1937		1810	Wyoming	United States	2014-05-23	7574	Verified	Website
1938		1811	British Columbia	Canada	2013-06-04	2852	Verified	Website
1939		1812	British Columbia	Canada	2013-06-04	2852	Verified	Website
1940		1813	British Columbia	Canada	2011-08-20	2852	Verified	Website
1941		1815	Idaho	United States	2014-05-24	2429	Verified	Website
1942		1816	Ontario	Canada	2014-05-24	4196	Invalid	Website
1943		1817	Washington	United States	2014-05-21	712	Verified	Website
1944		1818	Maine	United States	2014-05-24	5767	Invalid	Website
1945		1819	California	United States	2013-07-02	2562	Verified	Website
1946		1820	California	United States	2014-04-21	2562	Verified	Website
1947		1821	California	United States	2011-06-02	2562	Verified	Website
1948		1822	Maine	United States	2014-05-24	5767	Verified	Website
1949		1823	New Hampshire	United States	2014-05-24	3237	Verified	Website
1950		1824	Colorado	United States	2014-05-24	635	Verified	Website
1951		1825	Minnesota	United States	2014-05-24	3647	Verified	Website
1952		1826	Montana	United States	2014-05-23	6308	Verified	Website
1953		1827	Montana	United States	2014-05-23	6308	Verified	Website
1954		1828	Montana	United States	2014-05-22	6308	Verified	Website
1955		1829	Montana	United States	2014-05-22	6308	Invalid	Website
1956		1830	Montana	United States	2014-05-20	6308	Verified	Website
1957		1831	Montana	United States	2014-05-18	6308	Verified	Website
1958		1832	Oregon	United States	2014-05-02	2180	Verified	Website
1959		1833	California	United States	2014-05-24	4820	Invalid	Website
1960		1834	California	United States	2014-05-24	4820	Invalid	Website
1961		1835	Oregon	United States	2014-05-23	5886	Verified	Website
1962		1836	Missouri	United States	2011-06-06	740	Invalid	Website
1963		1837	California	United States	2014-05-24	268	Verified	Website
1964		1838	British Columbia	Canada	2014-05-24	2852	Verified	Website
1965		1839	Oregon	United States	2014-05-20	7685	Verified	Website
1966		1840	California	United States	2014-05-24	268	Verified	Website
1967		1841	Maine	United States	2014-05-24	5767	Verified	Website
1968		1842	Washington	United States	2014-05-24	8226	Verified	Website
1969		1843	Wisconsin	United States	2014-05-21	5804	Invalid	Website
1970		1844	British Columbia	Canada	2014-05-24	4357	Verified	Website
1971		1846	Wisconsin	United States	2014-05-08	5804	Invalid	Website
1972		1847	Colorado	United States	2014-05-25	3882	Verified	Website
1973		1848	Wisconsin	United States	2014-05-25	3947	Verified	Website
1974		1849	Massachusetts	United States	2014-05-24	6804	Verified	Website
1975		1850	Washington	United States	2014-05-19	6145	Verified	Website
1976		1851	California	United States	2014-05-25	6626	Tentative	Website
1977		1852	Washington	United States	2014-04-28	6145	Verified	Website
1978		1853	Iowa	United States	2014-05-25	5619	Verified	Website
1979		1854	British Columbia	Canada	2014-05-25	2386	Verified	Website
1980		1855	Ohio	United States	2014-05-25	4891	Invalid	Website
1981		1856	Virginia	United States	2014-05-25	2441	Verified	Website
1982		1857	California	United States	2014-05-24	6565	Invalid	Website
1983		1858	Oregon	United States	2014-05-23	1870	Verified	Website
1984		1859	Washington	United States	2014-04-30	1986	Verified	Website
1985		1860	Georgia	United States	2014-05-26	8502	Verified	Website
1986		1861	Georgia	United States	2014-05-26	8502	Verified	Website
1987		1862	Maryland	United States	2014-05-26	5617	Verified	Website
1988		1863	Maryland	United States	2014-05-26	5617	Invalid	Website
1989		1864	Ontario	Canada	2014-05-01	2556	Verified	Website
1990		1865	Montana	United States	2014-05-25	5335	Verified	Website
1991		1866	Washington	United States	2014-05-25	3779	Verified	Website
1992		1867	Washington	United States	2014-05-24	3779	Verified	Website
1993		1868	Ontario	Canada	2014-05-26	4331	Verified	Website
1994		1869	Ontario	Canada	2014-05-25	2723	Verified	Website
1995		1870	Washington	United States	2014-05-26	712	Verified	Website
1996		1871	Florida	United States	2014-05-21	7475	Verified	Website
1997		1872	Florida	United States	2014-05-19	7475	Verified	Website
1998		1873	British Columbia	Canada	2014-05-26	6962	Invalid	Website
1999		1874	Michigan	United States	2014-05-25	5083	Invalid	Website
[truncated: 21,018 more rows]
